# Supplementary material
Source: publisher figshare collection journal article supplement (https://acs.figshare.com/ndownloader/files/3732574)
Supplement: Supplementary file 1 [file 3732574]

## **Supporting Information**

# **Metabolomics to explore imidacloprid induced toxicity in the central nervous system of the freshwater snail *Lymnaea stagnalis***

*Sara Tufi<sup>\*</sup>, Jente M. Stel, Jacob de Boer, Marja H. Lamoree, Pim E.G. Leonards*

Institute for Environmental Studies (IVM), VU University Amsterdam, De Boelelaan 1087, 1081 HV  
Amsterdam, The Netherlands.

**\*Corresponding author's e-mail address:** sara.tufi@vu.nl, Telephone: +31 (0)20 5983232. Fax: +31 (0)20 5989553.

## Material and Methods

**Protein content measurement.** The protein content was determined by the Bradford colorimetric protein assay. For the calibration, bovine serum albumin (BSA) was used (Sigma-Aldrich). The Dye Reagent was purchased from Bio-Rad Laboratories (Richmond, CA, USA). The absorbance was measured with the SPECTRAmax 340PC 96 well-plate reader spectrophotometer (Molecular Devices, Sunnyvale, CA, USA).

**Acetylcholinesterase activity assay.** A potassium-phosphate buffer (0.1M  $\text{KH}_2\text{PO}_4/\text{K}_2\text{HPO}_4$ ) (Sigma-Aldrich), 5mM 5,5'-dithiobis-(2-nitrobenzoic acid) (DTNB) (99%, Sigma-Aldrich), and 0.8 mM S-acetylthiocholine-iodide (ATC) (98%, Sigma-Aldrich) were prepared. The samples were prepared by mixing 15  $\mu\text{L}$  of the CNS homogenate with 135  $\mu\text{L}$  of MilliQ water. Subsequently, a 96-well plate was filled with 50  $\mu\text{L}$  of 5  $\mu\text{M}$  DTNB and 50  $\mu\text{L}$  of 0.8 mM ATC. After 5 minutes of incubation, 50  $\mu\text{L}$  of the CNS sample was added in triplicate to the 96-well plate. The plate was placed in a SPECTRAmax 340PC Spectrophotometer, where the absorbance of the wells was measured at 412 nm for 30 minutes with 20 second intervals. Finally, the maximum rate of change in absorbance ( $V_{\text{max}}$ ) was analyzed with SoftmaxPro5.2. As positive control the AChE-inhibiting organophosphate pesticide chlorpyrifos (Sigma-Aldrich) was used.

## Results

### Imidaclopid exposure concentrations.

Before the exposure experiment, we have tested if imidaclopid concentrations were stable in copper-free water under the experimental condition of the sequent exposure experiment.

The beakers were filled with 150mL of copper-free water which were spiked with imidaclopid to reach the final concentration of 10  $\mu\text{g/L}$  and 1000  $\mu\text{g/L}$ . The experiment was carried out in triplicate and before injecting to the LC-MS/MS system, the IS was added to the samples. To

test if there was a significant decline in imidacloprid concentrations the analysis of variance (ANOVA) with post hoc Tukey's honestly significant difference (HSD) was performed with the software SPSS (IBM). No significant variations in imidacloprid concentrations were observed at both concentration of 10  $\mu\text{g/L}$  (Figure S1) and 1000  $\mu\text{g/L}$  (Figure S2).

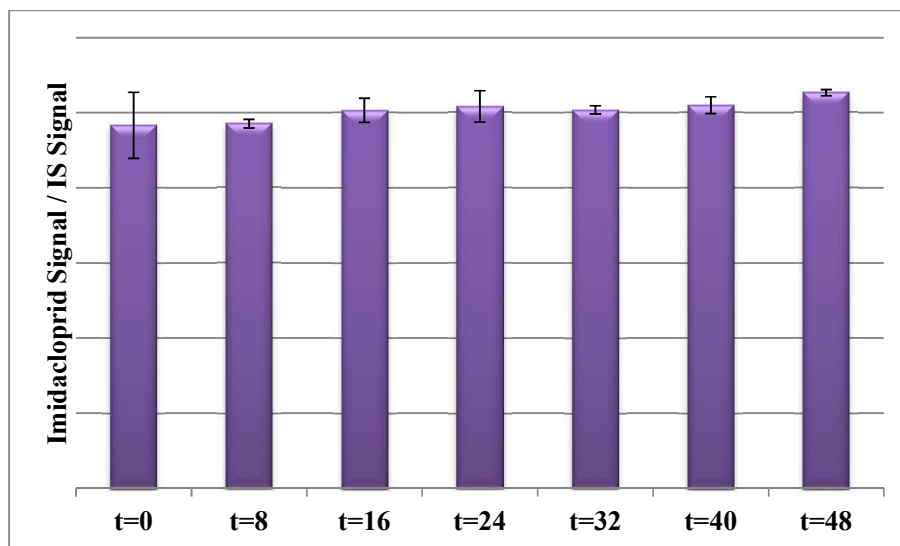

**Figure S1** Concentrations of imidacloprid at 10  $\mu\text{g/L}$  in copper-free water every 8 hours of 48 subsequent hours. (n=3, error bars = SE, \*=p<0.05).

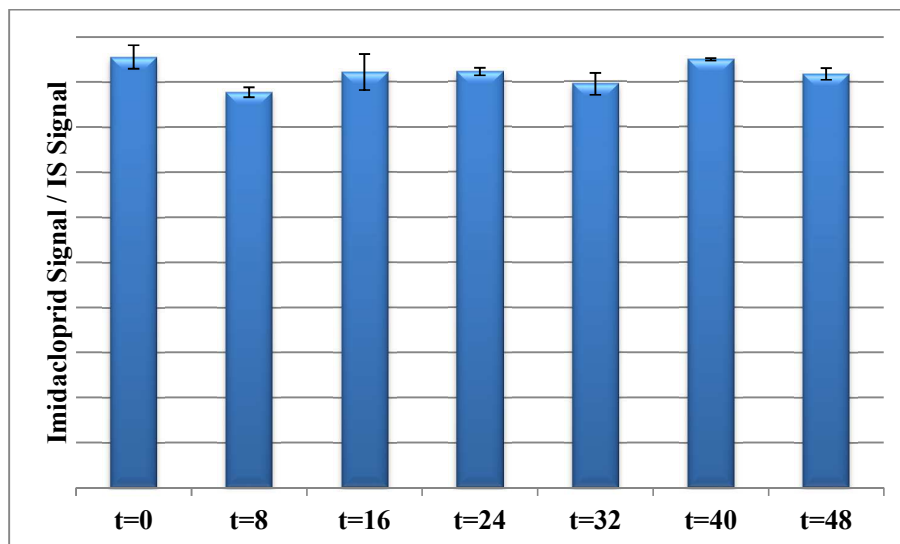

**Figure S2** Concentrations of imidacloprid at 1000  $\mu\text{g/L}$  in copper-free water every 8 hours of 48 subsequent hours. (n=3, error bars = SE, \*=p<0.05).

The concentration of imidacloprid in the exposure media were measured at two subsequent days of incubation (0, 24 and 48 h). The results are shown in Figure S3.

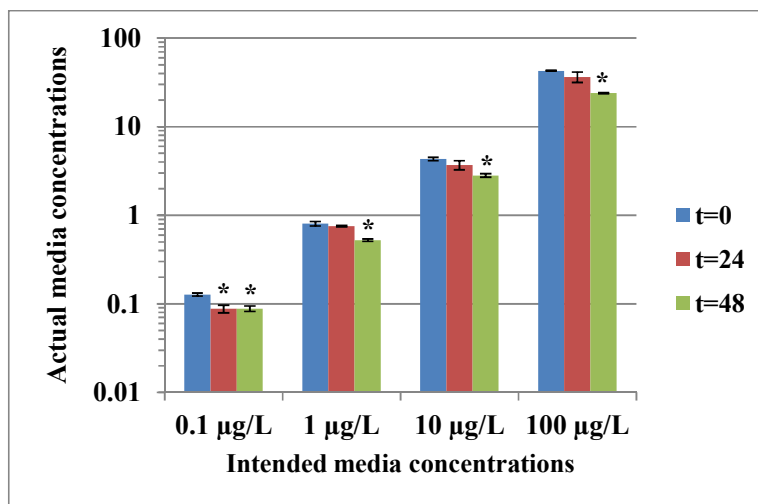

**Figure S3** Actual measured imidacloprid concentrations per exposure group in µg/L in 48 subsequent hours. (n=5, error bars = SE, \*=p<0.05).

The averaged actual concentrations of imidacloprid over 0, 24 and 48 hours of exposure were  $0.10 \pm 0.01$  µg/L,  $0.7 \mu\text{g} \pm 0.09$  µg/L,  $3.6 \pm 0.43$  µg/L and  $34.4 \pm 5.6$  µg/L for the exposure groups of 0.1 µg/L, 1 µg/L, 10 µg/L and 100 µg/L, respectively. The actual imidacloprid concentrations were in the range of the nominal concentration for the 0.1 and 1 µg/L groups. However for the higher dose groups (10 and 100 µg/L) the concentrations were about 3 times lower than the nominal concentration. For all exposure concentrations there was a significant decrease in imidacloprid concentration after 48 hours (ANOVA,  $p\text{-value} < 0.01$ ). The deviation of the nominal concentrations for the two high dose groups could be due to bioaccumulation of imidacloprid in *L. stagnalis* which is also indicated by the decline of the concentrations in time. It has been found that the bioaccumulation factor of imidacloprid in snails is high<sup>2</sup>.

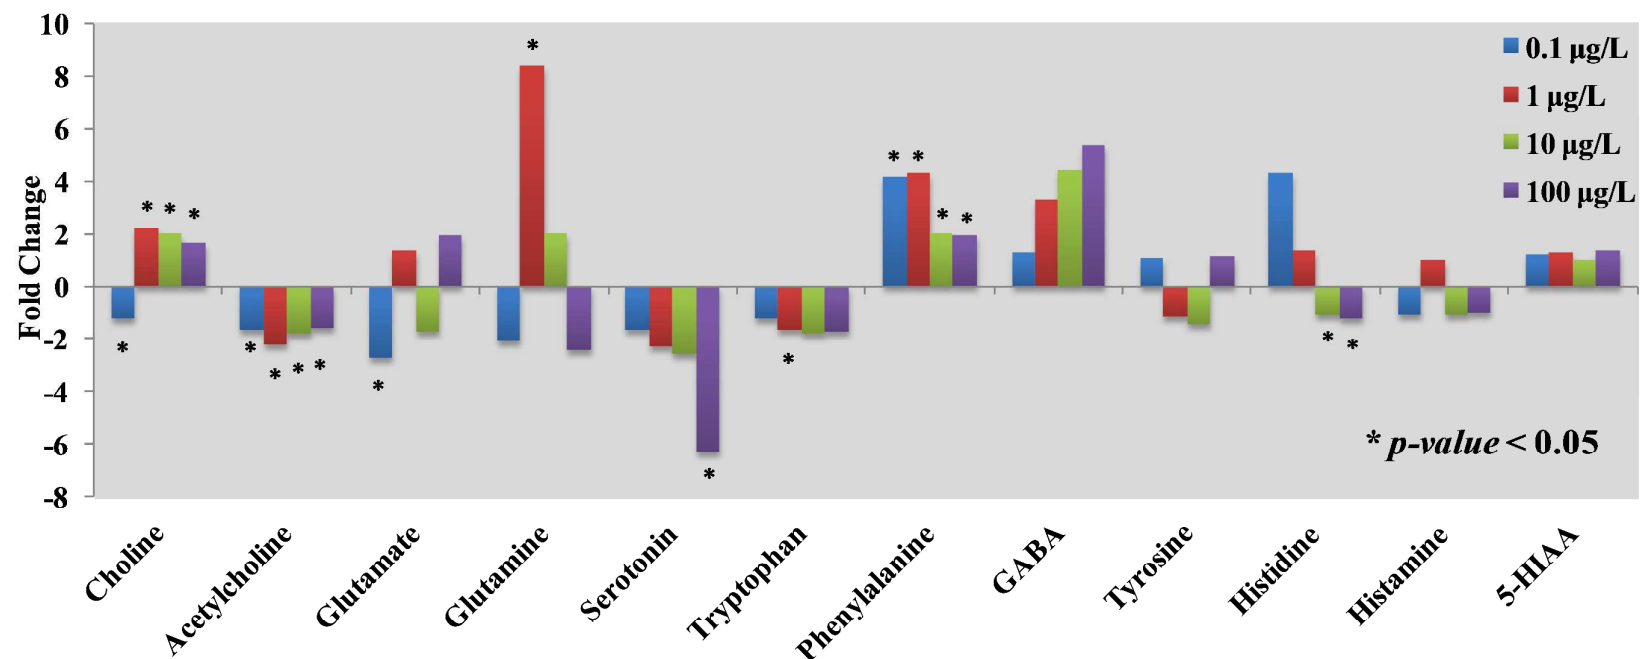

**Figure S4** Fold changes for the quantified neurotransmitters, precursors and metabolites in *L. stagnalis* CNS exposed to different imidacloprid concentrations.

### Traditional toxicological endpoints.

The AChE activity of *L. stagnalis* CNS exposed to different imidacloprid concentrations was tested. The average of  $V_{\max}$  compared to the control group was calculated for all exposure groups (Figure S3).

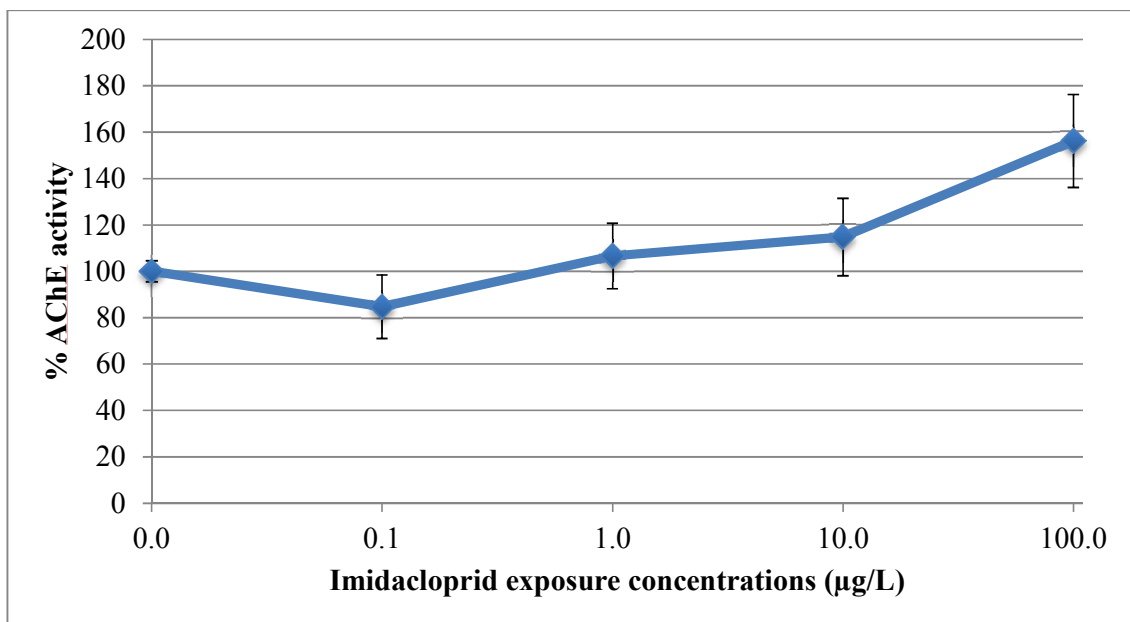

**Figure S5** Average AChE activity in *L. stagnalis* CNS after 10 days of exposure to increasing concentrations of imidacloprid ( $n=10$ ; error bars = SE).

The applicability of AChE bioassay to determine imidacloprid-induced toxic effects has been tested. The reliability was tested by incubating *L. stagnalis* CNS homogenate of unexposed snails with low concentrations of chlorpyrifos. Imidacloprid was tested to determine any intrinsic inhibiting effects on AChE. The protein contents, determined with the Bradford assay, were used to normalize for the heterogeneity in CNS sample sizes. The positive control chlorpyrifos showed a significantly lowered enzyme activity compared to the controls. This result confirmed the applicability of this assay to determine AChE activity in CNS samples of imidacloprid-exposed snails. Imidacloprid did, however, not significantly reduce the enzyme activity (Figure S4).

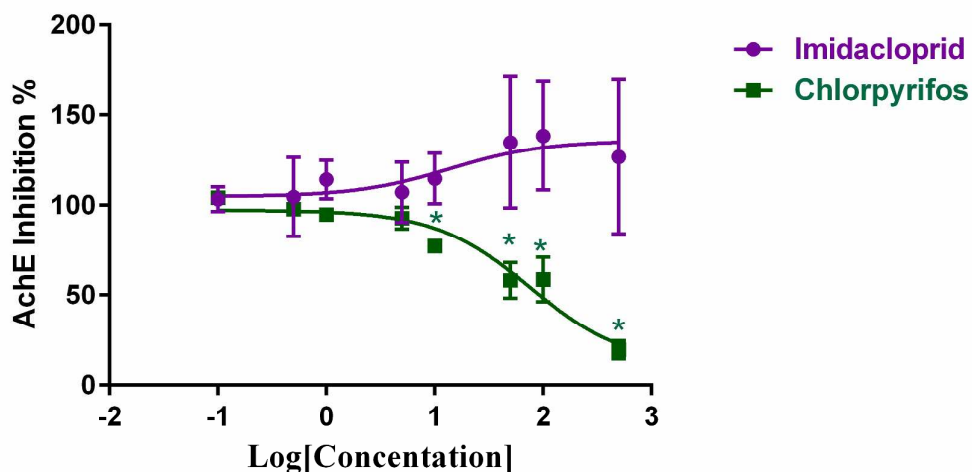

**Figure S6** AChE activity inhibition % in CNS samples after 20 minutes of incubation to imidacloprid and chlorpyrifos, normalized for the controls. ( $n=3$ ; error bars=SE; \* $p$ -value <0.05).

No significant effects were observed on phenotypical endpoint of mortality and reproduction. *L. stagnalis* is able to reproduce through parthenogenesis and for this reason it is a well-suited species for isolated reproduction experiments<sup>3</sup>. Effects on the reproduction of *L. stagnalis* were tested by measuring the number of laid eggs and the dried weight of the egg clutches. The ANOVA performed on the egg count (Figure S5 (A)) and measurements of the dry weight of the egg clutches (Figure S5 (B)) of snails exposed to imidacloprid did not show significant differences between the exposure groups and the control. Even though reproductive outputs have been shown before to be a sensitive endpoint in *L. stagnalis*, the incubation time used in this study was probably too short to induce a significant effect on the snail reproduction<sup>3</sup>. Nevertheless, these results indicate that the lowest effect concentration (LOEC) for the analysed sublethal endpoints in *L. stagnalis* is higher than 34  $\mu\text{g/L}$  for 10 days of exposure. This is in agreement with a high LOEC for imidacloprid found in another aquatic snail species: 25,000  $\mu\text{g/L}$  caused heart rate effects in embryos of *Marisa cornuarietis* after 10 days of exposure<sup>4</sup>. Furthermore, Nyman et al.<sup>2</sup> found that the  $\text{LC}_{50}$  of *L. stagnalis* was about 50,000  $\mu\text{g/L}$  with 4 days of exposure.

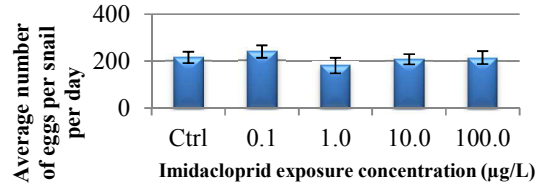

**(A)** Average number of eggs per snail per day within groups exposed to different concentrations of imidacloprid for ten days. ( $n=10$ , error bars = SE,  $*p<0.05$ ).

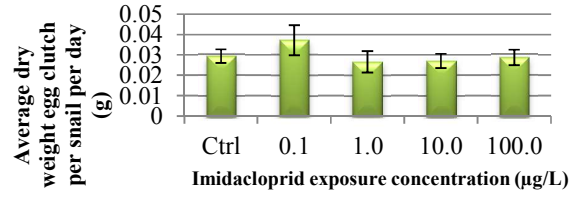

**(B)** Average of the dry weight of egg clutches per snail per day within groups exposed to different concentrations of imidacloprid for ten days. ( $n=10$ , error bars = SE,  $*p<0.05$ )

**Figure S7** Imidacloprid effect on the number of laid eggs (A) and dried egg clutches weights (B) of the freshwater snail *L. stagnalis*.



## Tables and Figures legend:

**Figure S1** Concentrations of imidacloprid at 10 µg/L in copper-free water every 8 hours of 48 subsequent hours. (n=3, error bars = SE, \*=p<0.05).

**Figure S2** Concentrations of imidacloprid at 1000 µg/L in copper-free water every 8 hours of 48 subsequent hours. (n=3, error bars = SE, \*=p<0.05).

**Figure S3** Actual measured imidacloprid concentrations per exposure group in 48 subsequent hours with their original intended imidacloprid concentrations. (n=5; error bars = SE; \*=p-value <0.05).

**Figure S4** Fold changes for the quantified neurotransmitters, precursors and metabolites in *L. stagnalis* CNS exposed to different imidacloprid concentrations.

**Figure S5** Average AChE activity in *L. stagnalis* CNS after 10 days of exposure to increasing concentrations of imidacloprid (n=10; error bars = SE).

**Figure S6** AChE activity inhibition % in CNS samples after 20 minutes of incubation to imidacloprid and chlorpyrifos, normalized for the controls. (n=3; error bars=SE; \*p-value <0.05).

**Figure S7** Imidacloprid effect on the number of laid eggs (A) and dried egg clutches weights (B) of the freshwater snail *L. stagnalis*.

**Table S1** Libraries of metabolite standards used for the target analysis.

**Table S2** Metabolite identified in the different exposure groups. Fold change and p-values corrected by false discovery rate (FDR) are reported. Marked in red the metabolites significantly different for more three exposure concentrations and in green are marked the p-values below 0.05.

**Table S3** Area under the ROC curve (AUC) for metabolite showing AUC > 0.8 in more than three exposure concentrations.

**Figure S8** ROC curves for acetylcholine in the CNS of *L. stagnalis* exposed to increasing concentration of imidacloprid.

**Table S1** Libraries of metabolite standards used for the target analysis.

| METABOLITE NAME             | Supplier      | Analytical Platform | Detected in sample | m/z      | Molecular Formula | RT   | Mass Error (ppm) |
|-----------------------------|---------------|---------------------|--------------------|----------|-------------------|------|------------------|
| 3-METHYL-2-OXOVALERIC ACID  | IROA<br>MSMLS | Non-targeted (ToF)  | √                  | 130.0630 | C6H10O3           | 2.1  | <2ppm            |
| 4-GUANIDINO-BUTANOATE       | IROA<br>MSMLS | Non-targeted (ToF)  | √                  | 145.0851 | C5H11N3O2         | 8.7  | <2ppm            |
| 4-METHYL-2-OXOVALERIC ACID  | IROA<br>MSMLS | Non-targeted (ToF)  | √                  | 130.0630 | C6H10O3           | 2.1  | <2ppm            |
| 5-HIAA                      | Sigma-Aldrich | Targeted (QqQ)      | √                  | 191.0582 | C10H9NO3          | 3.4  | <2ppm            |
| 5'-METHYLTHIOADENOSINE      | IROA<br>MSMLS | Non-targeted (ToF)  | √                  | 297.0896 | C11H15N5O3S       | 14.1 | <2ppm            |
| ACETYLCHOLINE               | Sigma-Aldrich | Targeted (QqQ)      | √                  | 146.1176 | C7H16NO2          | 3.0  | <2ppm            |
| ADENINE                     | IROA<br>MSMLS | Non-targeted (ToF)  | √                  | 135.0545 | C5H5N5            | 5.8  | <2ppm            |
| ALPHALINOLENIC ACID         | Sigma-Aldrich | Non-targeted (ToF)  | √                  | 292.2402 | C19H32O2          | 21.4 | <2ppm            |
| ARACHIDIC ACID              | IROA<br>MSMLS | Non-targeted (ToF)  | √                  | 326.3185 | C21H42O2          | 25.1 | <2ppm            |
| ARACHIDONIC ACID            | Sigma-Aldrich | Non-targeted (ToF)  | √                  | 318.2559 | C21H34O2          | 24.1 | <2ppm            |
| BETAINE                     | IROA<br>MSMLS | Non-targeted (ToF)  | √                  | 117.0790 | C5H11NO2          | 9.2  | <2ppm            |
| CARNITINE                   | IROA<br>MSMLS | Non-targeted (ToF)  | √                  | 161.1052 | C7H15NO3          | 9.8  | <2ppm            |
| CHOLINE                     | Sigma-Aldrich | Targeted (QqQ)      | √                  | 104.1075 | C5H14NO           | 6.3  | <2ppm            |
| CIS10HEPTADECENOIC ACID     | Sigma-Aldrich | Non-targeted (ToF)  | √                  | 282.2560 | C18H34O2          | 20.2 | <2ppm            |
| CIS1114EICOSADIENOIC ACID   | Sigma-Aldrich | Non-targeted (ToF)  | √                  | 322.2872 | C21H38O2          | 24.7 | <2ppm            |
| CIS1117EICOSATRIENOIC ACID  | Sigma-Aldrich | Non-targeted (ToF)  | √                  | 320.2715 | C21H36O2          | 24.3 | <2ppm            |
| CIS11EICOSENOIC ACID        | Sigma-Aldrich | Non-targeted (ToF)  | √                  | 324.3028 | C21H40O2          | 24.7 | <2ppm            |
| CIS1316DOCOSADIENOIC ACID   | Sigma-Aldrich | Non-targeted (ToF)  | √                  | 350.3185 | C23H42O2          | 27.4 | <2ppm            |
| CIS15TETRACOSENOIC ACID     | Sigma-Aldrich | Non-targeted (ToF)  | √                  | 380.3654 | C25H48O2          | 29.9 | <2ppm            |
| CIS517EICOSAPENTAENOIC ACID | Sigma-Aldrich | Non-targeted (ToF)  | √                  | 316.2402 | C21H32O2          | 24.1 | <2ppm            |

|                           |               |                    |   |          |            |      |       |
|---------------------------|---------------|--------------------|---|----------|------------|------|-------|
| CIS814EICOSATRIENOIC ACID | Sigma-Aldrich | Non-targeted (ToF) | √ | 320.2715 | C21H36O2   | 24.7 | <2ppm |
| CREATININE                | IROA          | Non-targeted (ToF) | √ | 113.0589 | C4H7N3O    | 6.0  | <2ppm |
|                           | MSMLS         |                    |   |          |            |      |       |
| DIETHANOLAMINE            | IROA          | Non-targeted (ToF) | √ | 105.0790 | C4H11NO2   | 9.3  | <2ppm |
|                           | MSMLS         |                    |   |          |            |      |       |
| DIMETHYLBENZIMIDAZOLE     | IROA          | Non-targeted (ToF) | √ | 146.0844 | C9H10N2    | 8.9  | <2ppm |
|                           | MSMLS         |                    |   |          |            |      |       |
| DOCOSAHEXAENOIC ACID      | IROA          | Non-targeted (ToF) | √ | 328.2402 | C22H32O2   | 1.9  | <2ppm |
|                           | MSMLS         |                    |   |          |            |      |       |
| ELAIDIC ACID              | Sigma-Aldrich | Non-targeted (ToF) | √ | 296.2715 | C19H36O2   | 21.8 | <2ppm |
|                           | IROA          |                    |   |          |            |      |       |
| ELAIDIC ACID              | MSMLS         | Non-targeted (ToF) | √ | 296.2715 | C19H36O2   | 21.8 | <2ppm |
|                           |               |                    |   |          |            |      |       |
| GABA                      | Sigma-Aldrich | Targeted (QqQ)     | √ | 103.0633 | C4H9NO2    | 12.1 | <2ppm |
| GAMMALINOLENIC ACID       | Sigma-Aldrich | Non-targeted (ToF) | √ | 292.2402 | C19H32O2   | 21.7 | <2ppm |
| GLUTAMATE                 | Sigma-Aldrich | Targeted (QqQ)     | √ | 147.0532 | C5H9NO4    | 13.6 | <2ppm |
| GLUTAMINE                 | Sigma-Aldrich | Targeted (QqQ)     | √ | 146.0691 | C5H10N2O3  | 13.3 | <2ppm |
|                           | IROA          |                    |   |          |            |      |       |
| GUANINE                   | MSMLS         | Non-targeted (ToF) | √ | 151.0494 | C5H5N5O    | 7.7  | <2ppm |
|                           | IROA          |                    |   |          |            |      |       |
| GUANOSINE                 | MSMLS         | Non-targeted (ToF) | √ | 283.0917 | C10H13N5O5 | 9.0  | <2ppm |
|                           |               |                    |   |          |            |      |       |
| HENICOSANOIC ACID         | Sigma-Aldrich | Non-targeted (ToF) | √ | 340.3341 | C22H44O2   | 26.5 | <2ppm |
| HEPTADECANOIC ACID        | Sigma-Aldrich | Non-targeted (ToF) | √ | 284.2715 | C18H36O2   | 20.6 | <2ppm |
| HISTAMINE                 | Sigma-Aldrich | Targeted (QqQ)     | √ | 111.0797 | C5H9N3     | 18.3 | <2ppm |
| HISTIDINE                 | Sigma-Aldrich | Targeted (QqQ)     | √ | 155.0695 | C6H9N3O2   | 15.8 | <2ppm |
|                           | IROA          |                    |   |          |            |      |       |
| HYPOXANTHINE              | MSMLS         | Non-targeted (ToF) | √ | 136.0385 | C5H4N4O    | 6.0  | <2ppm |
|                           | IROA          |                    |   |          |            |      |       |
| INDOLE-3-ACETALDEHYDE     | MSMLS         | Non-targeted (ToF) | √ | 175.0633 | C10H9NO2   | 6.4  | <2ppm |
|                           | IROA          |                    |   |          |            |      |       |
| INOSINE                   | MSMLS         | Non-targeted (ToF) | √ | 268.0808 | C10H12N4O5 | 8.3  | <2ppm |
|                           | IROA          |                    |   |          |            |      |       |
| LEUCINE                   | MSMLS         | Non-targeted (ToF) | √ | 131.0946 | C6H13NO2   | 8.6  | <2ppm |
|                           |               |                    |   |          |            |      |       |
| LINOLEIC ACID             | Sigma-Aldrich | Non-targeted (ToF) | √ | 294.2559 | C19H34O2   | 21.6 | <2ppm |
| LINOLELAIDIC ACID         | Sigma-Aldrich | Non-targeted (ToF) | √ | 294.2559 | C19H34O2   | 21.8 | <2ppm |
| L-TRYPTOPHAN              | Sigma-Aldrich | Targeted (QqQ)     | √ | 204.0899 | C11H12N2O2 | 10.7 | <2ppm |
| L-TYROSINE                | Sigma-Aldrich | Targeted (QqQ)     | √ | 181.0739 | C9H11NO3   | 12.1 | <2ppm |
| N6-(DELTA2-ISOPENTENYL)-  | IROA          | Non-targeted (ToF) | √ | 203.1171 | C10H13N5   | 8.8  | <2ppm |

|                              |               |                    |   |          |            |      |       |
|------------------------------|---------------|--------------------|---|----------|------------|------|-------|
| ADENINE                      | MSMLS         |                    |   |          |            |      |       |
| N-ACETYL-L-LEUCINE           | IROA          | Non-targeted (ToF) | √ | 173.1052 | C8H15NO3   | 1.4  | <2ppm |
|                              | MSMLS         |                    |   |          |            |      |       |
| N-ACETYLPUTRESCINE           | IROA          | Non-targeted (ToF) | √ | 130.1106 | C6H14N2O   | 8.8  | <2ppm |
|                              | MSMLS         |                    |   |          |            |      |       |
| N-ACETYLSEROTONIN            | IROA          | Non-targeted (ToF) | √ | 218.1055 | C12H14N2O2 | 5.0  | <2ppm |
|                              | MSMLS         |                    |   |          |            |      |       |
| NE,NE,NE-<br>TRIMETHYLLYSINE | IROA          | Non-targeted (ToF) | √ | 188.1525 | C9H20N2O2  | 12.7 | <2ppm |
|                              | MSMLS         |                    |   |          |            |      |       |
| NICOTINAMIDE                 | IROA          | Non-targeted (ToF) | √ | 122.0480 | C6H6N2O    | 3.0  | <2ppm |
|                              | MSMLS         |                    |   |          |            |      |       |
| O-ACETYL-L-CARNITINE         | IROA          | Non-targeted (ToF) | √ | 203.1158 | C9H17NO4   | 8.8  | <2ppm |
|                              | MSMLS         |                    |   |          |            |      |       |
| OLEIC ACID                   | Sigma-Aldrich | Non-targeted (ToF) | √ | 296.2715 | C19H36O2   | 21.6 | <2ppm |
| PALMITOLEIC ACID             | Sigma-Aldrich | Non-targeted (ToF) | √ | 268.2402 | C17H32O2   | 18.6 | <2ppm |
| PHENYLALANINE                | Sigma-Aldrich | Targeted (QqQ)     | √ | 165.0790 | C9H11NO2   | 10.3 | <2ppm |
|                              | IROA          |                    |   |          |            |      |       |
| PICOLINIC ACID               | MSMLS         | Non-targeted (ToF) | √ | 123.0320 | C6H5NO2    | 5.0  | <2ppm |
|                              | IROA          |                    |   |          |            |      |       |
| PIPECOLINIC ACID             | MSMLS         | Non-targeted (ToF) | √ | 129.0790 | C6H11NO2   | 10.4 | <2ppm |
|                              | IROA          |                    |   |          |            |      |       |
| PROLINE                      | MSMLS         | Non-targeted (ToF) | √ | 115.0633 | C5H9NO2    | 9.8  | <2ppm |
|                              | IROA          |                    |   |          |            |      |       |
| PUTRESCINE                   | MSMLS         | Non-targeted (ToF) | √ | 88.1001  | C4H12N2    | 12.6 | <2ppm |
|                              | MSMLS         |                    |   |          |            |      |       |
| SEROTONIN                    | Sigma-Aldrich | Targeted (QqQ)     | √ | 176.0950 | C10H12N2O  | 10.5 | <2ppm |
|                              | IROA          |                    |   |          |            |      |       |
| SPERMIDINE                   | MSMLS         | Non-targeted (ToF) | √ | 145.1579 | C7H19N3    | 15.2 | <2ppm |
|                              | MSMLS         |                    |   |          |            |      |       |
| STEARIC ACID                 | Sigma-Aldrich | Non-targeted (ToF) | √ | 298.2872 | C19H38O2   | 22.2 | <2ppm |
| TETRACOSANOIC ACID           | Sigma-Aldrich | Non-targeted (ToF) | √ | 382.3811 | C25H50O2   | 30.3 | <2ppm |
|                              | IROA          |                    |   |          |            |      |       |
| THIOPURINE S-<br>METHYLESTER | MSMLS         | Non-targeted (ToF) | √ | 166.0313 | C6H6N4S    | 1.5  | <2ppm |
|                              | MSMLS         |                    |   |          |            |      |       |
| TRICOSANOIC ACID             | Sigma-Aldrich | Non-targeted (ToF) | √ | 368.3654 | C24H48O2   | 29.1 | <2ppm |
|                              | IROA          |                    |   |          |            |      |       |
| TRYPTOPHANAMIDE              | MSMLS         | Non-targeted (ToF) | √ | 203.1059 | C11H13N3O  | 5.8  | <2ppm |
|                              | IROA          |                    |   |          |            |      |       |
| URACIL                       | MSMLS         | Non-targeted (ToF) | √ | 112.0273 | C4H4N2O2   | 10.6 | <2ppm |
|                              | IROA          |                    |   |          |            |      |       |
| URIDINE                      | MSMLS         | Non-targeted (ToF) | √ | 244.0695 | C9H12N2O6  | 6.0  | <2ppm |

|                                                                     |               |                    |   |          |            |      |       |
|---------------------------------------------------------------------|---------------|--------------------|---|----------|------------|------|-------|
| URIDINE-5-MONOPHOSPHATE                                             | IROA<br>MSMLS | Non-targeted (ToF) | √ | 324.0359 | C9H13N2O9P | 9.2  | <2ppm |
| UROCANATE                                                           | IROA<br>MSMLS | Non-targeted (ToF) | √ | 138.0429 | C6H6N2O2   | 3.3  | <2ppm |
| VALINE                                                              | IROA<br>MSMLS | Non-targeted (ToF) | √ | 117.0790 | C5H11NO2   | 3.1  | <2ppm |
| XANTHINE                                                            | IROA<br>MSMLS | Non-targeted (ToF) | √ | 152.0334 | C5H4N4O2   | 15.0 | <2ppm |
| 5-AMINOIMIDAZOLE-4-CARBOXAMIDE-1-?-D-RIBOFURANOSYL 5'-MONOPHOSPHATE | IROA<br>MSMLS | Non-targeted (ToF) | x |          |            |      |       |
| (2-AMINOETHYL)PHOSPHONATE                                           | IROA<br>MSMLS | Non-targeted (ToF) | x |          |            |      |       |
| (R)-MALATE                                                          | IROA<br>MSMLS | Non-targeted (ToF) | x |          |            |      |       |
| (S)-1-PHENYLETHANOL                                                 | IROA<br>MSMLS | Non-targeted (ToF) | x |          |            |      |       |
| (S)-DIHYDROOROTATE                                                  | IROA<br>MSMLS | Non-targeted (ToF) | x |          |            |      |       |
| (S)-LACTATE                                                         | IROA<br>MSMLS | Non-targeted (ToF) | x |          |            |      |       |
| 1,2-DIDECANOYL-SN-GLYCERO-3-PHOSPHOCHOLINE                          | IROA<br>MSMLS | Non-targeted (ToF) | x |          |            |      |       |
| 1,2-DIPALMITOYL-RAC-GLYCERO-3-PHOSPHOETHANOLAMINE                   | IROA<br>MSMLS | Non-targeted (ToF) | x |          |            |      |       |
| 1,2-DIPALMITOYL-SN-GLYCEROL                                         | IROA<br>MSMLS | Non-targeted (ToF) | x |          |            |      |       |
| 10-HYDROXYDECANOATE                                                 | IROA<br>MSMLS | Non-targeted (ToF) | x |          |            |      |       |
| 12-HYDROXYDODECANOIC ACID                                           | IROA<br>MSMLS | Non-targeted (ToF) | x |          |            |      |       |
| 17A,21-DIHYDROXY-4-PREGNENE-3,20-DIONE                              | IROA<br>MSMLS | Non-targeted (ToF) | x |          |            |      |       |
| 1-HYDROXY-2-NAPHTHOATE                                              | IROA<br>MSMLS | Non-targeted (ToF) | x |          |            |      |       |

|                                                                               |               |                    |   |
|-------------------------------------------------------------------------------|---------------|--------------------|---|
| 1-METHYL-6,7-DIHYDROXY-<br>1,2,3,4-<br>TETRAHYDROISOQUINOLINE<br>HYDROBROMIDE | IROA<br>MSMLS | Non-targeted (ToF) | x |
| 1-NAPHTHYLAMINE                                                               | IROA<br>MSMLS | Non-targeted (ToF) | x |
| 2,3-DIHYDROXYBENZOATE                                                         | IROA<br>MSMLS | Non-targeted (ToF) | x |
| 2,3-DIPHOSPHO-D-GLYCERIC<br>ACID                                              | IROA<br>MSMLS | Non-targeted (ToF) | x |
| 2',4'-<br>DIHYDROXYACETOPHENONE                                               | IROA<br>MSMLS | Non-targeted (ToF) | x |
| 2,4-DIHYDROXYPTERIDINE                                                        | IROA<br>MSMLS | Non-targeted (ToF) | x |
| 2,4-DIHYDROXYPYRIMIDINE-<br>5-CARBOXYLIC ACID                                 | IROA<br>MSMLS | Non-targeted (ToF) | x |
| 2,5-DIHYDROXYBENZOATE                                                         | IROA<br>MSMLS | Non-targeted (ToF) | x |
| 2,5-DIMETHYLPYRAZINE                                                          | IROA<br>MSMLS | Non-targeted (ToF) | x |
| 2,6-DIHYDROXYPYRIDINE                                                         | IROA<br>MSMLS | Non-targeted (ToF) | x |
| 25-HYDROXYCHOLESTEROL                                                         | IROA<br>MSMLS | Non-targeted (ToF) | x |
| 2-ACETAMIDO-2-DEOXY-<br>BETA-D-GLUCOSYLAMINE                                  | IROA<br>MSMLS | Non-targeted (ToF) | x |
| 2-AMINO-2-METHYL-<br>PROPANOATE                                               | IROA<br>MSMLS | Non-targeted (ToF) | x |
| 2-AMINOETHYL<br>DIHYDROGEN PHOSPHATE                                          | IROA<br>MSMLS | Non-targeted (ToF) | x |
| 2-AMINOPHENOL                                                                 | IROA<br>MSMLS | Non-targeted (ToF) | x |
| 2'-DEOXYADENOSINE                                                             | IROA<br>MSMLS | Non-targeted (ToF) | x |
| 2'-DEOXYADENOSINE 5'-<br>DIPHOSPHATE                                          | IROA<br>MSMLS | Non-targeted (ToF) | x |
| 2'-DEOXYADENOSINE 5'-<br>TRIPHOSPHATE                                         | IROA<br>MSMLS | Non-targeted (ToF) | x |
| 2'-DEOXYCYTIDINE 5'-                                                          | IROA          | Non-targeted (ToF) | x |

|                                             |               |                    |   |
|---------------------------------------------|---------------|--------------------|---|
| DIPHOSPHATE                                 | MSMLS         |                    |   |
| 2'-DEOXYCYTIDINE 5'-<br>MONOPHOSPHATE       | IROA<br>MSMLS | Non-targeted (ToF) | x |
| 2-DEOXY-D-GLUCOSE                           | IROA<br>MSMLS | Non-targeted (ToF) | x |
| 2'-DEOXYGUANOSINE                           | IROA<br>MSMLS | Non-targeted (ToF) | x |
| 2'-DEOXYGUANOSINE 5'-<br>DIPHOSPHATE        | IROA<br>MSMLS | Non-targeted (ToF) | x |
| 2'-DEOXYGUANOSINE 5'-<br>MONOPHOSPHATE      | IROA<br>MSMLS | Non-targeted (ToF) | x |
| 2'-DEOXYGUANOSINE 5'-<br>TRIPHOSPHATE       | IROA<br>MSMLS | Non-targeted (ToF) | x |
| 2'-DEOXYURIDINE 5'-<br>MONOPHOSPHATE        | IROA<br>MSMLS | Non-targeted (ToF) | x |
| 2'-DEOXYURIDINE 5'-<br>TRIPHOSPHATE         | IROA<br>MSMLS | Non-targeted (ToF) | x |
| 2-HYDROXY-4-<br>(METHYLTHIO)BUTYRIC<br>ACID | IROA<br>MSMLS | Non-targeted (ToF) | x |
| 2-HYDROXYBUTYRIC ACID                       | IROA<br>MSMLS | Non-targeted (ToF) | x |
| 2-HYDROXYPHENYLACETIC<br>ACID               | IROA<br>MSMLS | Non-targeted (ToF) | x |
| 2-HYDROXYPYRIDINE                           | IROA<br>MSMLS | Non-targeted (ToF) | x |
| 2-METHOXYETHANOL                            | IROA<br>MSMLS | Non-targeted (ToF) | x |
| 2-METHYLBUTANAL                             | IROA<br>MSMLS | Non-targeted (ToF) | x |
| 2-METHYLGLUTARIC ACID                       | IROA<br>MSMLS | Non-targeted (ToF) | x |
| 2-METHYLMALEATE                             | IROA<br>MSMLS | Non-targeted (ToF) | x |
| 2-METHYLPROPANAL OXIME                      | IROA<br>MSMLS | Non-targeted (ToF) | x |
| 2-METHYLPROPANOATE                          | IROA<br>MSMLS | Non-targeted (ToF) | x |
| 2-OXOADIPATE                                | IROA          | Non-targeted (ToF) | x |

|                           |       |                    |   |
|---------------------------|-------|--------------------|---|
|                           | MSMLS |                    |   |
| 2-OXOBUTANOATE            | IROA  | Non-targeted (ToF) |   |
|                           | MSMLS |                    | x |
| 2-QUINOLINECARBOXYLIC     | IROA  | Non-targeted (ToF) |   |
| ACID                      | MSMLS |                    | x |
| 3(2-                      | IROA  | Non-targeted (ToF) |   |
| HYDROXYPHENYL)PROPANO     | MSMLS |                    | x |
| ATE                       |       |                    |   |
| 3(4-                      | IROA  | Non-targeted (ToF) |   |
| HYDROXYPHENYL)LACTATE     | MSMLS |                    | x |
| 3-(4-                     | IROA  | Non-targeted (ToF) |   |
| HYDROXYPHENYL)PYRUVAT     | MSMLS |                    | x |
| E                         |       |                    |   |
| 3,3-DIAMINOPROPANE        | IROA  | Non-targeted (ToF) |   |
|                           | MSMLS |                    | x |
| 3,4-DIHYDROXY-1-          | IROA  | Non-targeted (ToF) |   |
| PHENYLALANINE             | MSMLS |                    | x |
| 3,4-DIHYDROXYBENZOATE     | IROA  | Non-targeted (ToF) |   |
|                           | MSMLS |                    | x |
| 3,4-DIHYDROXYPHENYL       | IROA  | Non-targeted (ToF) |   |
| GLYCOL                    | MSMLS |                    | x |
| 3,4-                      | IROA  | Non-targeted (ToF) |   |
| DIHYDROXYPHENYLACETAT     | MSMLS |                    | x |
| E                         |       |                    |   |
| 3',5'-CYCLIC AMP          | IROA  | Non-targeted (ToF) |   |
|                           | MSMLS |                    | x |
| 3,5-DIIODO-L-THYRONINE    | IROA  | Non-targeted (ToF) |   |
|                           | MSMLS |                    | x |
| 3,5-DIIODO-L-TYROSINE     | IROA  | Non-targeted (ToF) |   |
|                           | MSMLS |                    | x |
| 3ALPHA,11BETA,17ALPHA,21- | IROA  | Non-targeted (ToF) |   |
| TRETRAHYDROXY-5ALPHA-     | MSMLS |                    | x |
| PREGNAN-20-ONE            |       |                    |   |
| 3ALPHA-HYDROXY-5-BETA-    | IROA  | Non-targeted (ToF) |   |
| CHOLANATE                 | MSMLS |                    | x |
| 3-AMINO-4-                | IROA  | Non-targeted (ToF) |   |
| HYDROXYBENZOIC ACID       | MSMLS |                    | x |
| 3-AMINO-5-                | IROA  | Non-targeted (ToF) |   |
| HYDROXYBENZOIC ACID       | MSMLS |                    | x |



|                              |               |                    |   |
|------------------------------|---------------|--------------------|---|
| 3-AMINOISOBUTANOATE          | IROA<br>MSMLS | Non-targeted (ToF) | x |
| 3'-CMP                       | IROA<br>MSMLS | Non-targeted (ToF) | x |
| 3-DEHYDROSHIKIMATE           | IROA<br>MSMLS | Non-targeted (ToF) | x |
| 3-HYDROXY-3-METHYLGLUTARATE  | IROA<br>MSMLS | Non-targeted (ToF) | x |
| 3-HYDROXYANTHRANILATE        | IROA<br>MSMLS | Non-targeted (ToF) | x |
| 3-HYDROXYBENZALDEHYDE        | IROA<br>MSMLS | Non-targeted (ToF) | x |
| 3-HYDROXYBENZOATE            | IROA<br>MSMLS | Non-targeted (ToF) | x |
| 3-HYDROXYBENZYL ALCOHOL      | IROA<br>MSMLS | Non-targeted (ToF) | x |
| 3-HYDROXYBUTANOIC ACID       | IROA<br>MSMLS | Non-targeted (ToF) | x |
| 3-HYDROXYKYNURENINE          | IROA<br>MSMLS | Non-targeted (ToF) | x |
| 3-HYDROXYPHENYLACETATE       | IROA<br>MSMLS | Non-targeted (ToF) | x |
| 3-HYDROXYPYRUVATE            | IROA<br>MSMLS | Non-targeted (ToF) | x |
| 3-METHOXY-4-HYDROXYMANDELATE | IROA<br>MSMLS | Non-targeted (ToF) | x |
| 3-METHOXY-L-TYROSINE         | IROA<br>MSMLS | Non-targeted (ToF) | x |
| 3-METHOXYTYRAMINE            | IROA<br>MSMLS | Non-targeted (ToF) | x |
| 3-METHYL-2-OXINDOLE          | IROA<br>MSMLS | Non-targeted (ToF) | x |
| 3-METHYLADENINE              | IROA<br>MSMLS | Non-targeted (ToF) | x |
| 3-METHYLBUTANAL              | IROA<br>MSMLS | Non-targeted (ToF) | x |
| 3-METHYLBUTANOL              | IROA<br>MSMLS | Non-targeted (ToF) | x |
| 3-METHYLCROTONYL-COA         | IROA          | Non-targeted (ToF) | x |

|                                 |               |                    |   |
|---------------------------------|---------------|--------------------|---|
|                                 | MSMLS         |                    |   |
| 3-METHYLGLUTARIC ACID           | IROA<br>MSMLS | Non-targeted (ToF) | x |
| 3-METHYLHISTAMINE               | IROA<br>MSMLS | Non-targeted (ToF) | x |
| 3-MT                            | Sigma-Aldrich | Targeted (QqQ)     | x |
| 3-SULFINO-L-ALANINE             | IROA<br>MSMLS | Non-targeted (ToF) | x |
| 3-UREIDOPROPIONIC ACID          | IROA<br>MSMLS | Non-targeted (ToF) | x |
| 4-ACETAMIDOBUTANOATE            | IROA<br>MSMLS | Non-targeted (ToF) | x |
| 4-AMINOBENZOATE                 | IROA<br>MSMLS | Non-targeted (ToF) | x |
| 4-AMINOBUTANOATE                | IROA<br>MSMLS | Non-targeted (ToF) | x |
| 4-AMINOBUTANOIC ACID            | IROA<br>MSMLS | Non-targeted (ToF) | x |
| 4-COUMARATE                     | IROA<br>MSMLS | Non-targeted (ToF) | x |
| 4-HYDROXY-3-METHOXYPHENYLGLYCOL | IROA<br>MSMLS | Non-targeted (ToF) | x |
| 4-HYDROXYBENZALDEHYDE           | IROA<br>MSMLS | Non-targeted (ToF) | x |
| 4-HYDROXYBENZOATE               | IROA<br>MSMLS | Non-targeted (ToF) | x |
| 4-HYDROXY-L-PHENYLGLYCINE       | IROA<br>MSMLS | Non-targeted (ToF) | x |
| 4-HYDROXY-L-PROLINE             | IROA<br>MSMLS | Non-targeted (ToF) | x |
| 4-HYDROXYPHENYLACETATE          | IROA<br>MSMLS | Non-targeted (ToF) | x |
| 4-IMIDAZOLEACETIC ACID          | IROA<br>MSMLS | Non-targeted (ToF) | x |
| 4-METHYL-2-OXO-PENTANOIC ACID   | IROA<br>MSMLS | Non-targeted (ToF) | x |
| 4-METHYLCATECHOL                | IROA<br>MSMLS | Non-targeted (ToF) | x |

|                                  |               |                    |   |
|----------------------------------|---------------|--------------------|---|
| 4-PYRIDOXATE                     | IROA          | Non-targeted (ToF) |   |
|                                  | MSMLS         |                    | x |
| 4-QUINOLINECARBOXYLIC ACID       | IROA          | Non-targeted (ToF) |   |
|                                  | MSMLS         |                    | x |
| 5,6-DIHYDROURACIL                | IROA          | Non-targeted (ToF) |   |
|                                  | MSMLS         |                    | x |
| 5-AMINOLEVULINIC ACID            | IROA          | Non-targeted (ToF) |   |
|                                  | MSMLS         |                    | x |
| 5-AMINOPENTANOATE                | IROA          | Non-targeted (ToF) |   |
|                                  | MSMLS         |                    | x |
| 5'-DEOXYADENOSINE                | IROA          | Non-targeted (ToF) |   |
|                                  | MSMLS         |                    | x |
| 5-HYDROXYINDOLEACETATE           | IROA          | Non-targeted (ToF) |   |
|                                  | MSMLS         |                    | x |
| 5-HYDROXY-L-TRYPTOPHAN           | Sigma-Aldrich | Targeted (QqQ)     | x |
| 5-HYDROXY-L-TRYPTOPHAN           | IROA          | Non-targeted (ToF) |   |
|                                  | MSMLS         |                    | x |
| 5-HYDROXYMETHYLURACIL            | IROA          | Non-targeted (ToF) |   |
|                                  | MSMLS         |                    | x |
| 5-METHYLCYTOSINE                 | IROA          | Non-targeted (ToF) |   |
|                                  | MSMLS         |                    | x |
| 5-OXO-D-PROLINE                  | IROA          | Non-targeted (ToF) |   |
|                                  | MSMLS         |                    | x |
| 5-OXO-L-PROLINE                  | IROA          | Non-targeted (ToF) |   |
|                                  | MSMLS         |                    | x |
| 5-PHOSPHO-D-RIBOSE-1-DIPHOSPHATE | IROA          | Non-targeted (ToF) |   |
|                                  | MSMLS         |                    | x |
| 5-VALEROLACTONE                  | IROA          | Non-targeted (ToF) |   |
|                                  | MSMLS         |                    | x |
| 6-DEOXY-L-GALACTOSE              | IROA          | Non-targeted (ToF) |   |
|                                  | MSMLS         |                    | x |
| 6-HYDROXYDOPAMINE                | IROA          | Non-targeted (ToF) |   |
|                                  | MSMLS         |                    | x |
| 6-HYDROXYNICOTINATE              | IROA          | Non-targeted (ToF) |   |
|                                  | MSMLS         |                    | x |
| 6-PHOSPHOGLUCONIC ACID           | IROA          | Non-targeted (ToF) |   |
|                                  | MSMLS         |                    | x |
| ACETALDEHYDE                     | IROA          | Non-targeted (ToF) |   |
|                                  | MSMLS         |                    | x |

|                                                                |               |                    |   |
|----------------------------------------------------------------|---------------|--------------------|---|
| ACETOIN                                                        | IROA<br>MSMLS | Non-targeted (ToF) | x |
| ACETYLCHOLINE CHLORIDE                                         | IROA<br>MSMLS | Non-targeted (ToF) | x |
| ACONITATE                                                      | IROA<br>MSMLS | Non-targeted (ToF) | x |
| ADENOSINE                                                      | IROA<br>MSMLS | Non-targeted (ToF) | x |
| ADENOSINE 2',3'-CYCLIC<br>MONOPHOSPHATE                        | IROA<br>MSMLS | Non-targeted (ToF) | x |
| ADENOSINE 3',5'-CYCLIC<br>MONOPHOSPHATE                        | IROA<br>MSMLS | Non-targeted (ToF) | x |
| ADENOSINE 3',5'-<br>DIPHOSPHATE                                | IROA<br>MSMLS | Non-targeted (ToF) | x |
| ADENOSINE 5'-DIPHOSPHATE                                       | IROA<br>MSMLS | Non-targeted (ToF) | x |
| ADENOSINE 5'-<br>DIPHOSPHORIBOSE                               | IROA<br>MSMLS | Non-targeted (ToF) | x |
| ADENOSINE 5'-<br>MONOPHOSPHATE                                 | IROA<br>MSMLS | Non-targeted (ToF) | x |
| ADENOSINE 5'-<br>TRIPHOSPHATE                                  | IROA<br>MSMLS | Non-targeted (ToF) | x |
| ADENOSINE 5'-<br>TRIPHOSPHATE                                  | IROA<br>MSMLS | Non-targeted (ToF) | x |
| ADENOSINE-5'-<br>DIPHOSPHOGLUCOSE                              | IROA<br>MSMLS | Non-targeted (ToF) | x |
| A-D-GALACTOSE 1-<br>PHOSPHATE DIPOTASSIUM<br>SALT PENTAHYDRATE | IROA<br>MSMLS | Non-targeted (ToF) | x |
| ADIPIC ACID                                                    | IROA<br>MSMLS | Non-targeted (ToF) | x |
| AGMATINE SULFATE                                               | IROA<br>MSMLS | Non-targeted (ToF) | x |
| ALANINE                                                        | IROA<br>MSMLS | Non-targeted (ToF) | x |
| ALANINE                                                        | IROA<br>MSMLS | Non-targeted (ToF) | x |
| ALLANTOIN                                                      | IROA<br>MSMLS | Non-targeted (ToF) | x |

|                                 |               |                    |   |
|---------------------------------|---------------|--------------------|---|
| ALLOSE                          | IROA<br>MSMLS | Non-targeted (ToF) | x |
| ALLOTHREONINE                   | IROA<br>MSMLS | Non-targeted (ToF) | x |
| ALPHA-D-GLUCOSE 1-<br>PHOSPHATE | IROA<br>MSMLS | Non-targeted (ToF) | x |
| AMINOADIPATE                    | IROA<br>MSMLS | Non-targeted (ToF) | x |
| AMYLOSE                         | IROA<br>MSMLS | Non-targeted (ToF) | x |
| ANILINE                         | IROA<br>MSMLS | Non-targeted (ToF) | x |
| ANILINE-2-SULFONIC ACID         | IROA<br>MSMLS | Non-targeted (ToF) | x |
| ANTHRANILATE                    | IROA<br>MSMLS | Non-targeted (ToF) | x |
| ARABINOSE                       | IROA<br>MSMLS | Non-targeted (ToF) | x |
| ARABINOSE                       | IROA<br>MSMLS | Non-targeted (ToF) | x |
| ARACHIC ACID                    | Sigma-Aldrich | Non-targeted (ToF) | x |
| ARGININE                        | IROA<br>MSMLS | Non-targeted (ToF) | x |
| ASCORBATE                       | IROA<br>MSMLS | Non-targeted (ToF) | x |
| ASPARAGINE                      | IROA<br>MSMLS | Non-targeted (ToF) | x |
| ASPARTATE                       | IROA<br>MSMLS | Non-targeted (ToF) | x |
| ASPARTATE                       | IROA<br>MSMLS | Non-targeted (ToF) | x |
| AZELAIC ACID                    | IROA<br>MSMLS | Non-targeted (ToF) | x |
| BENZALDEHYDE                    | IROA<br>MSMLS | Non-targeted (ToF) | x |
| BENZOATE                        | IROA<br>MSMLS | Non-targeted (ToF) | x |
| BENZYL ALCOHOL                  | IROA<br>MSMLS | Non-targeted (ToF) | x |

|                                                            |               |                    |   |
|------------------------------------------------------------|---------------|--------------------|---|
| BENZYLAMINE                                                | IROA<br>MSMLS | Non-targeted (ToF) | x |
| BETA-ALANINE                                               | IROA<br>MSMLS | Non-targeted (ToF) | x |
| BETA-CAROTENE                                              | IROA<br>MSMLS | Non-targeted (ToF) | x |
| BETA-NICOTINAMIDE<br>ADENINE DINUCLEOTIDE 2'-<br>PHOSPHATE | IROA<br>MSMLS | Non-targeted (ToF) | x |
| BETA-NICOTINAMIDE<br>ADENINE DINUCLEOTIDE<br>PHOSPHATE     | IROA<br>MSMLS | Non-targeted (ToF) | x |
| BILIRUBIN                                                  | IROA<br>MSMLS | Non-targeted (ToF) | x |
| BILIVERDIN                                                 | IROA<br>MSMLS | Non-targeted (ToF) | x |
| BIOTIN                                                     | IROA<br>MSMLS | Non-targeted (ToF) | x |
| BIS(2-<br>ETHYLHEXYL)PHTHALATE                             | IROA<br>MSMLS | Non-targeted (ToF) | x |
| BIS(3-AMINOPROPYL)AMINE                                    | IROA<br>MSMLS | Non-targeted (ToF) | x |
| BUTANAL                                                    | IROA<br>MSMLS | Non-targeted (ToF) | x |
| BUTANEDIOL                                                 | IROA<br>MSMLS | Non-targeted (ToF) | x |
| BUTANOATE                                                  | IROA<br>MSMLS | Non-targeted (ToF) | x |
| BUTYRIC ACID                                               | Sigma-Aldrich | Non-targeted (ToF) | x |
| CADAVERINE                                                 | IROA<br>MSMLS | Non-targeted (ToF) | x |
| CAFFEIC ACID                                               | IROA<br>MSMLS | Non-targeted (ToF) | x |
| CAFFEINE                                                   | IROA<br>MSMLS | Non-targeted (ToF) | x |
| CAPRYLIC ACID                                              | IROA<br>MSMLS | Non-targeted (ToF) | x |
| CARBAMOYL PHOSPHATE                                        | IROA<br>MSMLS | Non-targeted (ToF) | x |

|                                 |               |                    |   |
|---------------------------------|---------------|--------------------|---|
| CARNOSINE                       | IROA<br>MSMLS | Non-targeted (ToF) | x |
| CATECHOL                        | IROA<br>MSMLS | Non-targeted (ToF) | x |
| CELLOBIOSE                      | IROA<br>MSMLS | Non-targeted (ToF) | x |
| CHENODEOXYCHOLATE               | IROA<br>MSMLS | Non-targeted (ToF) | x |
| CHOLESTEROL PALMITATE           | IROA<br>MSMLS | Non-targeted (ToF) | x |
| CHOLESTERYL ACETATE             | IROA<br>MSMLS | Non-targeted (ToF) | x |
| CHOLESTRA-5,7-DIEN-3BETA-<br>OL | IROA<br>MSMLS | Non-targeted (ToF) | x |
| CHOLESTRYL OLEATE               | IROA<br>MSMLS | Non-targeted (ToF) | x |
| CHOLIC ACID                     | IROA<br>MSMLS | Non-targeted (ToF) | x |
| CHOLINE                         | IROA<br>MSMLS | Non-targeted (ToF) | x |
| CINNAMALDEHYDE                  | IROA<br>MSMLS | Non-targeted (ToF) | x |
| CINNAMATE                       | IROA<br>MSMLS | Non-targeted (ToF) | x |
| CIS10PENTADECENOIC ACID         | Sigma-Aldrich | Non-targeted (ToF) | x |
| CIS419DOCOSAHEXAENOIC<br>ACID   | Sigma-Aldrich | Non-targeted (ToF) | x |
| CIS-4-HYDROXY-D-PROLINE         | IROA<br>MSMLS | Non-targeted (ToF) | x |
| CITRATE                         | IROA<br>MSMLS | Non-targeted (ToF) | x |
| CITRULLINE                      | IROA<br>MSMLS | Non-targeted (ToF) | x |
| CMP                             | IROA<br>MSMLS | Non-targeted (ToF) | x |
| COENZYME A                      | IROA<br>MSMLS | Non-targeted (ToF) | x |
| CORTICOSTERONE                  | IROA<br>MSMLS | Non-targeted (ToF) | x |

|                                            |               |                    |   |
|--------------------------------------------|---------------|--------------------|---|
| CORTISOL                                   | IROA<br>MSMLS | Non-targeted (ToF) | x |
| CORTISOL 21-ACETATE                        | IROA<br>MSMLS | Non-targeted (ToF) | x |
| CORTISONE                                  | IROA<br>MSMLS | Non-targeted (ToF) | x |
| CREATINE                                   | IROA<br>MSMLS | Non-targeted (ToF) | x |
| CREATINE PHOSPHATE<br>DIBASIC TETRAHYDRATE | IROA<br>MSMLS | Non-targeted (ToF) | x |
| CYCLOPENTANONE                             | IROA<br>MSMLS | Non-targeted (ToF) | x |
| CYS-GLY                                    | IROA<br>MSMLS | Non-targeted (ToF) | x |
| CYSTATHIONINE                              | IROA<br>MSMLS | Non-targeted (ToF) | x |
| CYSTEAMINE                                 | IROA<br>MSMLS | Non-targeted (ToF) | x |
| CYSTEIC ACID                               | IROA<br>MSMLS | Non-targeted (ToF) | x |
| CYSTEINE                                   | IROA<br>MSMLS | Non-targeted (ToF) | x |
| CYSTINE                                    | IROA<br>MSMLS | Non-targeted (ToF) | x |
| CYTIDINE                                   | IROA<br>MSMLS | Non-targeted (ToF) | x |
| CYTIDINE 2',3'-CYCLIC<br>MONOPHOSPHATE     | IROA<br>MSMLS | Non-targeted (ToF) | x |
| CYTIDINE 5'-DIPHOSPHATE                    | IROA<br>MSMLS | Non-targeted (ToF) | x |
| CYTIDINE 5'-<br>DIPHOSPHOCHOLINE           | IROA<br>MSMLS | Non-targeted (ToF) | x |
| CYTIDINE 5'-TRIPHOSPHATE                   | IROA<br>MSMLS | Non-targeted (ToF) | x |
| CYTOCHROME C                               | IROA<br>MSMLS | Non-targeted (ToF) | x |
| CYTOSINE                                   | IROA<br>MSMLS | Non-targeted (ToF) | x |
| D-(-)-3-PHOSPHO-GLYCERIC                   | IROA          | Non-targeted (ToF) | x |



|                                 |               |                    |   |
|---------------------------------|---------------|--------------------|---|
| ACID                            | MSMLS         |                    |   |
| D-(+)-GALACTOSAMINE             | IROA<br>MSMLS | Non-targeted (ToF) | x |
| D(+)-RAFFINOSE                  | IROA<br>MSMLS | Non-targeted (ToF) | x |
| D-(+)-TREHALOSE                 | IROA<br>MSMLS | Non-targeted (ToF) | x |
| DECANOATE                       | IROA<br>MSMLS | Non-targeted (ToF) | x |
| DECANOIC ACID                   | Sigma-Aldrich | Non-targeted (ToF) | x |
| DEHYDROASCORBATE                | IROA<br>MSMLS | Non-targeted (ToF) | x |
| DEHYDRO-L-(+)-ASCORBIC<br>ACID  | IROA<br>MSMLS | Non-targeted (ToF) | x |
| DEOXYADENOSINE<br>MONOPHOSPHATE | IROA<br>MSMLS | Non-targeted (ToF) | x |
| DEOXYCARNITINE                  | IROA<br>MSMLS | Non-targeted (ToF) | x |
| DEOXYCHOLIC ACID                | IROA<br>MSMLS | Non-targeted (ToF) | x |
| DEOXYCHOLIC ACID                | IROA<br>MSMLS | Non-targeted (ToF) | x |
| DEOXYCORTICOSTERONE             | IROA<br>MSMLS | Non-targeted (ToF) | x |
| DEOXYCYTIDINE                   | IROA<br>MSMLS | Non-targeted (ToF) | x |
| DEOXYRIBOSE                     | IROA<br>MSMLS | Non-targeted (ToF) | x |
| DEOXYURIDINE                    | IROA<br>MSMLS | Non-targeted (ToF) | x |
| DESMOSTEROL                     | IROA<br>MSMLS | Non-targeted (ToF) | x |
| DETHIOBIOTIN                    | IROA<br>MSMLS | Non-targeted (ToF) | x |
| D-FRUCTOSE 6-PHOSPHATE          | IROA<br>MSMLS | Non-targeted (ToF) | x |
| D-GLUCONO-1,5-LACTONE           | IROA<br>MSMLS | Non-targeted (ToF) | x |

|                                 |               |                    |   |
|---------------------------------|---------------|--------------------|---|
| D-GLUCOSAMINE 6-PHOSPHATE       | IROA<br>MSMLS | Non-targeted (ToF) | x |
| D-GLUCOSAMINE 6-SULFATE         | IROA<br>MSMLS | Non-targeted (ToF) | x |
| D-GLUCOSE 6-PHOSPHATE           | IROA<br>MSMLS | Non-targeted (ToF) | x |
| D-GLUCOSE-6-PHOSPHATE           | IROA<br>MSMLS | Non-targeted (ToF) | x |
| DIACETYL                        | IROA<br>MSMLS | Non-targeted (ToF) | x |
| DIETHYL-2-METHYL-3-OXOSUCCINATE | IROA<br>MSMLS | Non-targeted (ToF) | x |
| DIHYDROFOLATE                   | IROA<br>MSMLS | Non-targeted (ToF) | x |
| DIHYDROXYACETONE PHOSPHATE      | IROA<br>MSMLS | Non-targeted (ToF) | x |
| DIHYDROXYFUMARIC ACID           | IROA<br>MSMLS | Non-targeted (ToF) | x |
| DIHYDROXYMANDELIC ACID          | IROA<br>MSMLS | Non-targeted (ToF) | x |
| DIMETHYL SULFIDE                | IROA<br>MSMLS | Non-targeted (ToF) | x |
| DIMETHYLALLYL PYROPHOSPHATE     | IROA<br>MSMLS | Non-targeted (ToF) | x |
| DL-5-HYDROXYLYSINE              | IROA<br>MSMLS | Non-targeted (ToF) | x |
| D-LACTOSE                       | IROA<br>MSMLS | Non-targeted (ToF) | x |
| D-LYXOSE                        | IROA<br>MSMLS | Non-targeted (ToF) | x |
| D-MANNOSAMINE                   | IROA<br>MSMLS | Non-targeted (ToF) | x |
| D-MANNOSE 6-PHOSPHATE           | IROA<br>MSMLS | Non-targeted (ToF) | x |
| DOCOSANOIC ACID                 | Sigma-Aldrich | Non-targeted (ToF) | x |
| DODECANOIC ACID                 | Sigma-Aldrich | Non-targeted (ToF) | x |
| DOPA                            | Sigma-Aldrich | Targeted (QqQ)     | x |
| DOPAMINE                        | Sigma-Aldrich | Targeted (QqQ)     | x |

|                                |               |                    |   |
|--------------------------------|---------------|--------------------|---|
| DOPAMINE                       | IROA<br>MSMLS | Non-targeted (ToF) | x |
| D-ORNITHINE                    | IROA<br>MSMLS | Non-targeted (ToF) | x |
| D-PANTOTHENIC ACID             | IROA<br>MSMLS | Non-targeted (ToF) | x |
| D-RIBOSE 5-PHOSPHATE           | IROA<br>MSMLS | Non-targeted (ToF) | x |
| DTMP                           | IROA<br>MSMLS | Non-targeted (ToF) | x |
| EPINEPHRINE                    | IROA<br>MSMLS | Non-targeted (ToF) | x |
| EPINEPRHINE                    | Sigma-Aldrich | Targeted (QqQ)     | x |
| ERUCIC ACID                    | Sigma-Aldrich | Non-targeted (ToF) | x |
| ERUCIC ACID                    | IROA<br>MSMLS | Non-targeted (ToF) | x |
| ERYTHRITOL                     | IROA<br>MSMLS | Non-targeted (ToF) | x |
| ESTRADIOL-17ALPHA              | IROA<br>MSMLS | Non-targeted (ToF) | x |
| ETHANOLAMINE                   | IROA<br>MSMLS | Non-targeted (ToF) | x |
| ETHANOLAMINE PHOSPHATE         | IROA<br>MSMLS | Non-targeted (ToF) | x |
| ETHYL-3-INDOLE-ACETATE         | IROA<br>MSMLS | Non-targeted (ToF) | x |
| ETHYL-3-<br>UREIDOPROPIONATE   | IROA<br>MSMLS | Non-targeted (ToF) | x |
| ETHYLMALONIC ACID              | IROA<br>MSMLS | Non-targeted (ToF) | x |
| FARNESYL DIPHOSPHATE           | IROA<br>MSMLS | Non-targeted (ToF) | x |
| FERULATE                       | IROA<br>MSMLS | Non-targeted (ToF) | x |
| FLAVIN ADENINE<br>DINUCLEOTIDE | IROA<br>MSMLS | Non-targeted (ToF) | x |
| FOLIC ACID                     | IROA<br>MSMLS | Non-targeted (ToF) | x |

|                                 |               |                    |   |
|---------------------------------|---------------|--------------------|---|
| FORMAMIDE                       | IROA<br>MSMLS | Non-targeted (ToF) | x |
| FORMATE                         | IROA<br>MSMLS | Non-targeted (ToF) | x |
| FORMYL-L-METHIONYL              | IROA<br>MSMLS | Non-targeted (ToF) | x |
| FRUCTOSE                        | IROA<br>MSMLS | Non-targeted (ToF) | x |
| FRUCTOSE 1,6-BIPHOSPHATE        | IROA<br>MSMLS | Non-targeted (ToF) | x |
| FUMARATE                        | IROA<br>MSMLS | Non-targeted (ToF) | x |
| GALACTARATE                     | IROA<br>MSMLS | Non-targeted (ToF) | x |
| GALACTITOL                      | IROA<br>MSMLS | Non-targeted (ToF) | x |
| GALACTOSE                       | IROA<br>MSMLS | Non-targeted (ToF) | x |
| GALACTURONIC ACID               | IROA<br>MSMLS | Non-targeted (ToF) | x |
| GERANYL PYROPHOSPHATE           | IROA<br>MSMLS | Non-targeted (ToF) | x |
| GERANYLGERANYL<br>PYROPHOSPHATE | IROA<br>MSMLS | Non-targeted (ToF) | x |
| GLUCONIC ACID                   | IROA<br>MSMLS | Non-targeted (ToF) | x |
| GLUCOSAMINATE                   | IROA<br>MSMLS | Non-targeted (ToF) | x |
| GLUCOSAMINE                     | IROA<br>MSMLS | Non-targeted (ToF) | x |
| GLUCOSE                         | IROA<br>MSMLS | Non-targeted (ToF) | x |
| GLUCURONIC ACID                 | IROA<br>MSMLS | Non-targeted (ToF) | x |
| GLUCURONOLACTONE                | IROA<br>MSMLS | Non-targeted (ToF) | x |
| GLUTAMIC ACID                   | IROA<br>MSMLS | Non-targeted (ToF) | x |
| GLUTAMINE                       | IROA          | Non-targeted (ToF) | x |

|                                |               |                    |   |
|--------------------------------|---------------|--------------------|---|
|                                | MSMLS         |                    |   |
| GLUTARATE                      | IROA<br>MSMLS | Non-targeted (ToF) | x |
| GLUTARIC ACID                  | IROA<br>MSMLS | Non-targeted (ToF) | x |
| GLUTATHIONE                    | IROA<br>MSMLS | Non-targeted (ToF) | x |
| GLYCERALDEHYDE                 | IROA<br>MSMLS | Non-targeted (ToF) | x |
| GLYCERALDEHYDE 3-<br>PHOSPHATE | IROA<br>MSMLS | Non-targeted (ToF) | x |
| GLYCERATE                      | IROA<br>MSMLS | Non-targeted (ToF) | x |
| GLYCERIC ACID                  | IROA<br>MSMLS | Non-targeted (ToF) | x |
| GLYCEROL                       | IROA<br>MSMLS | Non-targeted (ToF) | x |
| GLYCEROL 2-PHOSPHATE           | IROA<br>MSMLS | Non-targeted (ToF) | x |
| GLYCERYL TRIMYRISTATE          | IROA<br>MSMLS | Non-targeted (ToF) | x |
| GLYCERYL TRIPALMITATE          | IROA<br>MSMLS | Non-targeted (ToF) | x |
| GLYCINE                        | IROA<br>MSMLS | Non-targeted (ToF) | x |
| GLYCOCHOLATE                   | IROA<br>MSMLS | Non-targeted (ToF) | x |
| GLYCOLALDEHYDE                 | IROA<br>MSMLS | Non-targeted (ToF) | x |
| GLYCOLATE                      | IROA<br>MSMLS | Non-targeted (ToF) | x |
| GLYOXYLIC ACID                 | IROA<br>MSMLS | Non-targeted (ToF) | x |
| GUAIACOL                       | IROA<br>MSMLS | Non-targeted (ToF) | x |
| GUANIDINOACETATE               | IROA<br>MSMLS | Non-targeted (ToF) | x |
| GUANOSINE 3',5'-CYCLIC         | IROA<br>MSMLS | Non-targeted (ToF) | x |

|                                  |               |                    |   |
|----------------------------------|---------------|--------------------|---|
| GUANOSINE 5'-DIPHOSPHATE         | IROA<br>MSMLS | Non-targeted (ToF) | x |
| GUANOSINE 5'-DIPHOSPHO-D-MANNOSE | IROA<br>MSMLS | Non-targeted (ToF) | x |
| GUANOSINE 5'-DIPHOSPHOGLUCOSE    | IROA<br>MSMLS | Non-targeted (ToF) | x |
| GUANOSINE 5'-MONOPHOSPHATE       | IROA<br>MSMLS | Non-targeted (ToF) | x |
| GUANOSINE 5'-TRIPHOSPHATE        | IROA<br>MSMLS | Non-targeted (ToF) | x |
| GULONIC ACID                     | IROA<br>MSMLS | Non-targeted (ToF) | x |
| HEPTANOIC ACID                   | IROA<br>MSMLS | Non-targeted (ToF) | x |
| HEXADECANOL                      | IROA<br>MSMLS | Non-targeted (ToF) | x |
| HEXANOIC ACID                    | Sigma-Aldrich | Non-targeted (ToF) | x |
| HIPPURATE                        | IROA<br>MSMLS | Non-targeted (ToF) | x |
| HISTAMINE                        | IROA<br>MSMLS | Non-targeted (ToF) | x |
| HISTIDINE                        | IROA<br>MSMLS | Non-targeted (ToF) | x |
| HISTIDINE                        | IROA<br>MSMLS | Non-targeted (ToF) | x |
| HISTIDINOL                       | IROA<br>MSMLS | Non-targeted (ToF) | x |
| HOMOCYSTEINE                     | IROA<br>MSMLS | Non-targeted (ToF) | x |
| HOMOCYSTEINE THIOLACTONE         | IROA<br>MSMLS | Non-targeted (ToF) | x |
| HOMOCYSTINE                      | IROA<br>MSMLS | Non-targeted (ToF) | x |
| HOMOGENTISATE                    | IROA<br>MSMLS | Non-targeted (ToF) | x |
| HOMOSERINE                       | IROA<br>MSMLS | Non-targeted (ToF) | x |
| HOMOVANILLATE                    | IROA<br>MSMLS | Non-targeted (ToF) | x |

|                              |               |                    |   |
|------------------------------|---------------|--------------------|---|
| HYDROQUINONE                 | IROA<br>MSMLS | Non-targeted (ToF) | x |
| HYDROXYISOBUTYRIC ACID       | IROA<br>MSMLS | Non-targeted (ToF) | x |
| HYPOTAURINE                  | IROA<br>MSMLS | Non-targeted (ToF) | x |
| INDOLE                       | IROA<br>MSMLS | Non-targeted (ToF) | x |
| INDOLE-3-ACETAMIDE           | IROA<br>MSMLS | Non-targeted (ToF) | x |
| INDOLE-3-ACETATE             | IROA<br>MSMLS | Non-targeted (ToF) | x |
| INDOLE-3-ACETIC ACID         | IROA<br>MSMLS | Non-targeted (ToF) | x |
| INDOLE-3-ETHANOL             | IROA<br>MSMLS | Non-targeted (ToF) | x |
| INDOLE-3-PYRUVIC ACID        | IROA<br>MSMLS | Non-targeted (ToF) | x |
| INDOXYL SULFATE              | IROA<br>MSMLS | Non-targeted (ToF) | x |
| INOSINE 5'-DIPHOSPHATE       | IROA<br>MSMLS | Non-targeted (ToF) | x |
| INOSINE 5'-MONOPHOSPHATE     | IROA<br>MSMLS | Non-targeted (ToF) | x |
| INOSINE 5'-PHOSPHATE         | IROA<br>MSMLS | Non-targeted (ToF) | x |
| INOSINE 5'-TRIPHOSPHATE      | IROA<br>MSMLS | Non-targeted (ToF) | x |
| ISOCITRIC ACID               | IROA<br>MSMLS | Non-targeted (ToF) | x |
| ISOLEUCINE                   | IROA<br>MSMLS | Non-targeted (ToF) | x |
| ISOPENTENYL<br>PYROPHOSPHATE | IROA<br>MSMLS | Non-targeted (ToF) | x |
| ITACONATE                    | IROA<br>MSMLS | Non-targeted (ToF) | x |
| JASMONATE                    | IROA<br>MSMLS | Non-targeted (ToF) | x |
| KETOGLUTARIC ACID            | IROA          | Non-targeted (ToF) | x |

|                                    |       |                    |   |
|------------------------------------|-------|--------------------|---|
|                                    | MSMLS |                    |   |
| KYNURENIC ACID                     | IROA  | Non-targeted (ToF) | x |
|                                    | MSMLS |                    |   |
| KYNURENINE                         | IROA  | Non-targeted (ToF) | x |
|                                    | MSMLS |                    |   |
| KYNURENINE                         | IROA  | Non-targeted (ToF) | x |
|                                    | MSMLS |                    |   |
| L-2,3-DIAMINOPROPIONIC ACID        | IROA  | Non-targeted (ToF) | x |
|                                    | MSMLS |                    |   |
| L-2-PHOSPHOGLYCERIC ACID           | IROA  | Non-targeted (ToF) | x |
|                                    | MSMLS |                    |   |
| L-AMINOCYCLOPROPANE-1-CARBOXYLATE  | IROA  | Non-targeted (ToF) | x |
|                                    | MSMLS |                    |   |
| LANOSTEROL                         | IROA  | Non-targeted (ToF) | x |
|                                    | MSMLS |                    |   |
| L-ANSERINE                         | IROA  | Non-targeted (ToF) | x |
|                                    | MSMLS |                    |   |
| L-ARABITOL                         | IROA  | Non-targeted (ToF) | x |
|                                    | MSMLS |                    |   |
| LAURIC ACID                        | IROA  | Non-targeted (ToF) | x |
|                                    | MSMLS |                    |   |
| LAUROYL CARNITINE                  | IROA  | Non-targeted (ToF) | x |
|                                    | MSMLS |                    |   |
| LEUKOTRIENE B4                     | IROA  | Non-targeted (ToF) | x |
|                                    | MSMLS |                    |   |
| LIPOAMIDE                          | IROA  | Non-targeted (ToF) | x |
|                                    | MSMLS |                    |   |
| LITHIUM ACETOACETATE               | IROA  | Non-targeted (ToF) | x |
|                                    | MSMLS |                    |   |
| LITHIUM CARBAMOYLPHOSPHATE         | IROA  | Non-targeted (ToF) | x |
|                                    | MSMLS |                    |   |
| LITHIUM POTASSIUM ACETYL PHOSPHATE | IROA  | Non-targeted (ToF) | x |
|                                    | MSMLS |                    |   |
| LL-2,6-DIAMINOHEPTANEDIOATE        | IROA  | Non-targeted (ToF) | x |
|                                    | MSMLS |                    |   |
| L-METHIONINE                       | IROA  | Non-targeted (ToF) | x |
|                                    | MSMLS |                    |   |
| L-METHYLADENOSINE                  | IROA  | Non-targeted (ToF) | x |
|                                    | MSMLS |                    |   |



|                       |               |                    |   |
|-----------------------|---------------|--------------------|---|
| L-METHYLNICOTINAMIDE  | IROA<br>MSMLS | Non-targeted (ToF) | x |
| L-OLEOYL-RAC-GLYCEROL | IROA<br>MSMLS | Non-targeted (ToF) | x |
| LUMICHROME            | IROA<br>MSMLS | Non-targeted (ToF) | x |
| LYSINE                | IROA<br>MSMLS | Non-targeted (ToF) | x |
| LYSINE                | IROA<br>MSMLS | Non-targeted (ToF) | x |
| MALATE                | IROA<br>MSMLS | Non-targeted (ToF) | x |
| MALEAMATE             | IROA<br>MSMLS | Non-targeted (ToF) | x |
| MALEIC ACID           | IROA<br>MSMLS | Non-targeted (ToF) | x |
| MALEIMIDE             | IROA<br>MSMLS | Non-targeted (ToF) | x |
| MALONATE              | IROA<br>MSMLS | Non-targeted (ToF) | x |
| MALTOSE               | IROA<br>MSMLS | Non-targeted (ToF) | x |
| MANDELIC ACID         | IROA<br>MSMLS | Non-targeted (ToF) | x |
| MANNITOL              | IROA<br>MSMLS | Non-targeted (ToF) | x |
| MANNOSE               | IROA<br>MSMLS | Non-targeted (ToF) | x |
| MELANIN               | IROA<br>MSMLS | Non-targeted (ToF) | x |
| MELATONIN             | IROA<br>MSMLS | Non-targeted (ToF) | x |
| MELIBIOSE             | IROA<br>MSMLS | Non-targeted (ToF) | x |
| MENAQUINONE           | IROA<br>MSMLS | Non-targeted (ToF) | x |
| MERCAPTOPYRUVATE      | IROA<br>MSMLS | Non-targeted (ToF) | x |
| MESO-TARTARIC ACID    | IROA          | Non-targeted (ToF) | x |

|                                       |                       |                    |   |
|---------------------------------------|-----------------------|--------------------|---|
|                                       | MSMLS                 |                    |   |
| MESOXALATE                            | IROA<br>MSMLS         | Non-targeted (ToF) | x |
| METHIONINE                            | IROA<br>MSMLS         | Non-targeted (ToF) | x |
| METHYL ACETOACETATE                   | IROA<br>MSMLS         | Non-targeted (ToF) | x |
| METHYL BETA-D-<br>GALACTOSIDE         | IROA<br>MSMLS         | Non-targeted (ToF) | x |
| METHYL INDOLE-3-ACETATE               | IROA<br>MSMLS         | Non-targeted (ToF) | x |
| METHYL VANILLATE                      | IROA<br>MSMLS         | Non-targeted (ToF) | x |
| METHYLGUANDINE                        | IROA<br>MSMLS         | Non-targeted (ToF) | x |
| METHYLMALONATE                        | IROA<br>MSMLS         | Non-targeted (ToF) | x |
| MEVALOLACTONE                         | IROA<br>MSMLS         | Non-targeted (ToF) | x |
| MONO-ETHYL MALONATE                   | IROA<br>MSMLS         | Non-targeted (ToF) | x |
| MONO-METHYL GLUTARATE                 | IROA<br>MSMLS         | Non-targeted (ToF) | x |
| MYO-INOSITOL                          | IROA<br>MSMLS         | Non-targeted (ToF) | x |
| MYRISTIC ACID                         | Sigma-Aldrich<br>IROA | Non-targeted (ToF) | x |
| MYRISTIC ACID                         | MSMLS                 | Non-targeted (ToF) | x |
| MYRISTOLEIC ACID                      | Sigma-Aldrich         | Non-targeted (ToF) | x |
| N ALPHA-ACETYL-L-LYSINE               | IROA<br>MSMLS         | Non-targeted (ToF) | x |
| N(PAI)-METHYL-L-HISTIDINE             | IROA<br>MSMLS         | Non-targeted (ToF) | x |
| N,N-DIMETHYL-1,4-<br>PHENYLENEDIAMINE | IROA<br>MSMLS         | Non-targeted (ToF) | x |
| N,W-METHYLTRYPTAMINE                  | IROA<br>MSMLS         | Non-targeted (ToF) | x |
| N1-ACETYLSPERMINE                     | IROA                  | Non-targeted (ToF) | x |

|                             |               |                    |   |
|-----------------------------|---------------|--------------------|---|
|                             | MSMLS         |                    |   |
| N-ACETYL-D-GALACTOSAMINE    | IROA<br>MSMLS | Non-targeted (ToF) | x |
| N-ACETYL-D-GLUCOSAMINE      | IROA<br>MSMLS | Non-targeted (ToF) | x |
| N-ACETYL-DL-GLUTAMIC ACID   | IROA<br>MSMLS | Non-targeted (ToF) | x |
| N-ACETYL-DL-METHIONINE      | IROA<br>MSMLS | Non-targeted (ToF) | x |
| N-ACETYL-DL-SERINE          | IROA<br>MSMLS | Non-targeted (ToF) | x |
| N-ACETYL-D-MANNOSAMINE      | IROA<br>MSMLS | Non-targeted (ToF) | x |
| N-ACETYL-D-TRYPTOPHAN       | IROA<br>MSMLS | Non-targeted (ToF) | x |
| N-ACETYLGLYCINE             | IROA<br>MSMLS | Non-targeted (ToF) | x |
| N-ACETYL-L-ALANINE          | IROA<br>MSMLS | Non-targeted (ToF) | x |
| N-ACETYL-L-ASPARTIC ACID    | IROA<br>MSMLS | Non-targeted (ToF) | x |
| N-ACETYL-L-CYSTEINE         | IROA<br>MSMLS | Non-targeted (ToF) | x |
| N-ACETYL-L-PHENYLALANINE    | IROA<br>MSMLS | Non-targeted (ToF) | x |
| N-ACETYLNEURAMINATE         | IROA<br>MSMLS | Non-targeted (ToF) | x |
| NAD                         | IROA<br>MSMLS | Non-targeted (ToF) | x |
| N-ALPHA-ACETYL-L-ASPARAGINE | IROA<br>MSMLS | Non-targeted (ToF) | x |
| N-AMIDINO-ASPARTATE         | IROA<br>MSMLS | Non-targeted (ToF) | x |
| NERVONIC ACID               | IROA<br>MSMLS | Non-targeted (ToF) | x |
| N-FORMYLGLYCINE             | IROA<br>MSMLS | Non-targeted (ToF) | x |
| NICOTINAMIDE                | IROA          |                    |   |
| HYPOXANTHINE                | MSMLS         | Non-targeted (ToF) | x |

|                          |               |                    |   |
|--------------------------|---------------|--------------------|---|
| DINUCLEOTIDE             |               |                    |   |
| NICOTINAMIDE             | IROA          |                    |   |
| MONONUCLEOTIDE           | MSMLS         | Non-targeted (ToF) | x |
| NICOTINATE               | IROA          |                    |   |
|                          | MSMLS         | Non-targeted (ToF) | x |
| NICOTINE                 | IROA          |                    |   |
|                          | MSMLS         | Non-targeted (ToF) | x |
| NICOTINIC ACID ADENINE   | IROA          |                    |   |
| DINUCLEOTIDE PHOSPHATE   | MSMLS         | Non-targeted (ToF) | x |
| NITRO-L-TYROSINE         | IROA          |                    |   |
|                          | MSMLS         | Non-targeted (ToF) | x |
| N-METHYL-D-ASPARTIC ACID | IROA          |                    |   |
|                          | MSMLS         | Non-targeted (ToF) | x |
| N-METHYL-L-GLUTARATE     | IROA          |                    |   |
|                          | MSMLS         | Non-targeted (ToF) | x |
| NONANOATE                | IROA          |                    |   |
|                          | MSMLS         | Non-targeted (ToF) | x |
| NORADRENALINE            | IROA          |                    |   |
|                          | MSMLS         | Non-targeted (ToF) | x |
| NOREPINEPRHINE           | Sigma-Aldrich | Targeted (QqQ)     | x |
| NORLEUCINE               | IROA          |                    |   |
|                          | MSMLS         | Non-targeted (ToF) | x |
| NORMETANEPHRINE          | IROA          |                    |   |
|                          | MSMLS         | Non-targeted (ToF) | x |
| NORMETANEPRHINE          | Sigma-Aldrich | Targeted (QqQ)     | x |
| NORVALINE                | IROA          |                    |   |
|                          | MSMLS         | Non-targeted (ToF) | x |
| O-ACETYL-L-SERINE        | IROA          |                    |   |
|                          | MSMLS         | Non-targeted (ToF) | x |
| OCTANOIC ACID            | Sigma-Aldrich | Non-targeted (ToF) | x |
| OCTOPAMINE               | IROA          |                    |   |
|                          | MSMLS         | Non-targeted (ToF) | x |
| O-PHOSPHO-DL-SERINE      | IROA          |                    |   |
|                          | MSMLS         | Non-targeted (ToF) | x |
| O-PHOSPHO-L-SERINE       | IROA          |                    |   |
|                          | MSMLS         | Non-targeted (ToF) | x |
| OPHTHALMIC ACID          | IROA          |                    |   |
|                          | MSMLS         | Non-targeted (ToF) | x |

|                         |               |                    |   |
|-------------------------|---------------|--------------------|---|
| ORNITHINE               | IROA<br>MSMLS | Non-targeted (ToF) | x |
| OROTATE                 | IROA<br>MSMLS | Non-targeted (ToF) | x |
| OROTIC ACID             | IROA<br>MSMLS | Non-targeted (ToF) | x |
| O-SUCCINYL-L-HOMOSERINE | IROA<br>MSMLS | Non-targeted (ToF) | x |
| OXALIC ACID             | IROA<br>MSMLS | Non-targeted (ToF) | x |
| OXALOACETATE            | IROA<br>MSMLS | Non-targeted (ToF) | x |
| OXALOMALIC ACID         | IROA<br>MSMLS | Non-targeted (ToF) | x |
| PALATINOSE              | IROA<br>MSMLS | Non-targeted (ToF) | x |
| PALMITIC ACID           | Sigma-Aldrich | Non-targeted (ToF) | x |
| PANTOLACTONE            | IROA<br>MSMLS | Non-targeted (ToF) | x |
| PARAXANTHINE            | IROA<br>MSMLS | Non-targeted (ToF) | x |
| PENTADECANOIC ACID      | Sigma-Aldrich | Non-targeted (ToF) | x |
| PENTANOATE              | IROA<br>MSMLS | Non-targeted (ToF) | x |
| PETROSELINIC ACID       | IROA<br>MSMLS | Non-targeted (ToF) | x |
| PHENETHYLAMINE          | IROA<br>MSMLS | Non-targeted (ToF) | x |
| PHENOL                  | IROA<br>MSMLS | Non-targeted (ToF) | x |
| PHENYL ACETATE          | IROA<br>MSMLS | Non-targeted (ToF) | x |
| PHENYLACETALDEHYDE      | IROA<br>MSMLS | Non-targeted (ToF) | x |
| PHENYLACETIC ACID       | IROA<br>MSMLS | Non-targeted (ToF) | x |
| PHENYLALANINE           | IROA<br>MSMLS | Non-targeted (ToF) | x |

|                       |       |                    |   |
|-----------------------|-------|--------------------|---|
| PHENYLETHANOLAMINE    | IROA  | Non-targeted (ToF) |   |
|                       | MSMLS |                    | x |
| PHOSPHO(ENOL)PYRUVIC  | IROA  | Non-targeted (ToF) |   |
| ACID                  | MSMLS |                    | x |
| PHOSPHOCHOLINE        | IROA  | Non-targeted (ToF) |   |
| CHLORIDE              | MSMLS |                    | x |
| PHOSPHOCREATINE       | IROA  | Non-targeted (ToF) |   |
|                       | MSMLS |                    | x |
| PHOSPHONOACETATE      | IROA  | Non-targeted (ToF) |   |
|                       | MSMLS |                    | x |
| PHOSPO(ENOL)PYRUVIC   | IROA  | Non-targeted (ToF) |   |
| ACID                  | MSMLS |                    | x |
| PHYLLQUINONE          | IROA  | Non-targeted (ToF) |   |
|                       | MSMLS |                    | x |
| PHYTIC ACID           | IROA  | Non-targeted (ToF) |   |
|                       | MSMLS |                    | x |
| PIMELIC ACID          | IROA  | Non-targeted (ToF) |   |
|                       | MSMLS |                    | x |
| PIPECOLIC ACID        | IROA  | Non-targeted (ToF) |   |
|                       | MSMLS |                    | x |
| POTASSIUM CITRAMALATE | IROA  | Non-targeted (ToF) |   |
|                       | MSMLS |                    | x |
| POTASSIUM SORBATE     | IROA  | Non-targeted (ToF) |   |
|                       | MSMLS |                    | x |
| PRENOL                | IROA  | Non-targeted (ToF) |   |
|                       | MSMLS |                    | x |
| PROPANAL              | IROA  | Non-targeted (ToF) |   |
|                       | MSMLS |                    | x |
| PROPANOATE            | IROA  | Non-targeted (ToF) |   |
|                       | MSMLS |                    | x |
| PROPENOATE            | IROA  | Non-targeted (ToF) |   |
|                       | MSMLS |                    | x |
| PROPYNOATE            | IROA  | Non-targeted (ToF) |   |
|                       | MSMLS |                    | x |
| PROTOPORPHYRIN        | IROA  | Non-targeted (ToF) |   |
|                       | MSMLS |                    | x |
| PSICOSE               | IROA  | Non-targeted (ToF) |   |
|                       | MSMLS |                    | x |
| PTERINE               | IROA  | Non-targeted (ToF) |   |
|                       |       |                    | x |

|                            |       |                    |   |
|----------------------------|-------|--------------------|---|
|                            | MSMLS |                    |   |
| PURINE                     | IROA  | Non-targeted (ToF) | x |
|                            | MSMLS |                    |   |
| PYRAZOLE                   | IROA  | Non-targeted (ToF) | x |
|                            | MSMLS |                    |   |
| PYRIDINE-2,3-DICARBOXYLATE | IROA  | Non-targeted (ToF) | x |
|                            | MSMLS |                    |   |
| PYRIDOXAL                  | IROA  | Non-targeted (ToF) | x |
|                            | MSMLS |                    |   |
| PYRIDOXAL 5'-PHOSPHATE     | IROA  | Non-targeted (ToF) | x |
|                            | MSMLS |                    |   |
| PYRIDOXAMINE               | IROA  | Non-targeted (ToF) | x |
|                            | MSMLS |                    |   |
| PYRIDOXINE                 | IROA  | Non-targeted (ToF) | x |
|                            | MSMLS |                    |   |
| PYRIMIDINE                 | IROA  | Non-targeted (ToF) | x |
|                            | MSMLS |                    |   |
| PYRROLE-2-CARBOXYLATE      | IROA  | Non-targeted (ToF) | x |
|                            | MSMLS |                    |   |
| PYRUVATE                   | IROA  | Non-targeted (ToF) | x |
|                            | MSMLS |                    |   |
| PYRUVIC ALDEHYDE           | IROA  | Non-targeted (ToF) | x |
|                            | MSMLS |                    |   |
| QUINATE                    | IROA  | Non-targeted (ToF) | x |
|                            | MSMLS |                    |   |
| QUINOLINE                  | IROA  | Non-targeted (ToF) | x |
|                            | MSMLS |                    |   |
| RAC-GLYCEROL-L-MYRISTATE   | IROA  | Non-targeted (ToF) | x |
|                            | MSMLS |                    |   |
| RESORCINOL                 | IROA  | Non-targeted (ToF) | x |
|                            | MSMLS |                    |   |
| RETINOATE                  | IROA  | Non-targeted (ToF) | x |
|                            | MSMLS |                    |   |
| RETINOL                    | IROA  | Non-targeted (ToF) | x |
|                            | MSMLS |                    |   |
| RETINYL PALMITATE          | IROA  | Non-targeted (ToF) | x |
|                            | MSMLS |                    |   |
| RHAMNOSE                   | IROA  | Non-targeted (ToF) | x |
|                            | MSMLS |                    |   |

|                                |               |                    |   |
|--------------------------------|---------------|--------------------|---|
| RIBITOL                        | IROA<br>MSMLS | Non-targeted (ToF) | x |
| RIBOFLAVIN                     | IROA<br>MSMLS | Non-targeted (ToF) | x |
| RIBOSE                         | IROA<br>MSMLS | Non-targeted (ToF) | x |
| RIBULOSE 1,5-BISPHOSPHATE      | IROA<br>MSMLS | Non-targeted (ToF) | x |
| ROSMARINIC ACID                | IROA<br>MSMLS | Non-targeted (ToF) | x |
| S-(5'-ADENOSYL)-L-HOMOCYSTEINE | IROA<br>MSMLS | Non-targeted (ToF) | x |
| S-(5'-ADENOSYL)-L-METHIONINE   | IROA<br>MSMLS | Non-targeted (ToF) | x |
| SACCHARIC ACID                 | IROA<br>MSMLS | Non-targeted (ToF) | x |
| SALICYLAMIDE                   | IROA<br>MSMLS | Non-targeted (ToF) | x |
| SALICYLIC ACID                 | IROA<br>MSMLS | Non-targeted (ToF) | x |
| SARCOSINE                      | IROA<br>MSMLS | Non-targeted (ToF) | x |
| S-CARBOXYMETHYL-L-CYSTEINE     | IROA<br>MSMLS | Non-targeted (ToF) | x |
| SELENOCYSTAMINE                | IROA<br>MSMLS | Non-targeted (ToF) | x |
| SELENOMETHIONINE               | IROA<br>MSMLS | Non-targeted (ToF) | x |
| SERINE                         | IROA<br>MSMLS | Non-targeted (ToF) | x |
| SEROTONIN CREATININE COMPLEX   | IROA<br>MSMLS | Non-targeted (ToF) | x |
| SEROTONIN HYDROCHLORIDE        | IROA<br>MSMLS | Non-targeted (ToF) | x |
| S-HEXYL-GLUTATHIONE            | IROA<br>MSMLS | Non-targeted (ToF) | x |
| SHIKIMATE                      | IROA<br>MSMLS | Non-targeted (ToF) | x |
| SN-GLYCEROL 3-PHOSPHATE        | IROA          | Non-targeted (ToF) | x |



|                                  |               |                    |   |
|----------------------------------|---------------|--------------------|---|
| BIS<br>(CYCLOHEXYLAMMONIUM)      | MSMLS         |                    |   |
| SN-GLYCEROL-3-<br>PHOSPHOCHOLINE | IROA<br>MSMLS | Non-targeted (ToF) | x |
| SODIUM BENZOATE                  | IROA<br>MSMLS | Non-targeted (ToF) | x |
| SODIUM D-GLUCONATE               | IROA<br>MSMLS | Non-targeted (ToF) | x |
| SODIUM PHENYLPYRUVATE            | IROA<br>MSMLS | Non-targeted (ToF) | x |
| SODIUM PROPIONATE                | IROA<br>MSMLS | Non-targeted (ToF) | x |
| SODIUM<br>TAUROLITHOCHOLATE      | IROA<br>MSMLS | Non-targeted (ToF) | x |
| SORBITOL                         | IROA<br>MSMLS | Non-targeted (ToF) | x |
| SORBOSE                          | IROA<br>MSMLS | Non-targeted (ToF) | x |
| SPERMIDINE                       | IROA<br>MSMLS | Non-targeted (ToF) | x |
| SPERMINE                         | IROA<br>MSMLS | Non-targeted (ToF) | x |
| SPHINGANINE                      | IROA<br>MSMLS | Non-targeted (ToF) | x |
| SPHINGOMYELIN                    | IROA<br>MSMLS | Non-targeted (ToF) | x |
| SQUALENE                         | IROA<br>MSMLS | Non-targeted (ToF) | x |
| STACHYOSE HYDRATE                | IROA<br>MSMLS | Non-targeted (ToF) | x |
| SUBERIC ACID                     | IROA<br>MSMLS | Non-targeted (ToF) | x |
| SUCCINATE                        | IROA<br>MSMLS | Non-targeted (ToF) | x |
| SUCCINATE                        | IROA<br>MSMLS | Non-targeted (ToF) | x |
| SUCROSE                          | IROA<br>MSMLS | Non-targeted (ToF) | x |
| TAGATOSE                         | IROA          | Non-targeted (ToF) | x |

|                                            |       |                    |   |
|--------------------------------------------|-------|--------------------|---|
|                                            | MSMLS |                    |   |
| TARTARIC ACID                              | IROA  | Non-targeted (ToF) | x |
|                                            | MSMLS |                    |   |
| TARTARIC ACID                              | IROA  | Non-targeted (ToF) | x |
|                                            | MSMLS |                    |   |
| TAURINE                                    | IROA  | Non-targeted (ToF) | x |
|                                            | MSMLS |                    |   |
| TETRAHYDROFOLATE                           | IROA  | Non-targeted (ToF) | x |
|                                            | MSMLS |                    |   |
| THEOBROMINE                                | IROA  | Non-targeted (ToF) | x |
|                                            | MSMLS |                    |   |
| THEOPHYLLINE                               | IROA  | Non-targeted (ToF) | x |
|                                            | MSMLS |                    |   |
| THIAMINE                                   | IROA  | Non-targeted (ToF) | x |
|                                            | MSMLS |                    |   |
| THIAMINE MONOPHOSPHATE                     | IROA  | Non-targeted (ToF) | x |
|                                            | MSMLS |                    |   |
| THIAMINE PYROPHOSPHATE                     | IROA  | Non-targeted (ToF) | x |
|                                            | MSMLS |                    |   |
| THIOACETATE                                | IROA  | Non-targeted (ToF) | x |
|                                            | MSMLS |                    |   |
| THIOUREA                                   | IROA  | Non-targeted (ToF) | x |
|                                            | MSMLS |                    |   |
| THREONINE                                  | IROA  | Non-targeted (ToF) | x |
|                                            | MSMLS |                    |   |
| THYMIDINE                                  | IROA  | Non-targeted (ToF) | x |
|                                            | MSMLS |                    |   |
| THYMIDINE 5'-<br>MONOPHOSPHATE             | IROA  | Non-targeted (ToF) | x |
|                                            | MSMLS |                    |   |
| THYMIDINE-5'-DIPHOSPHO-<br>ALPHA-D-GLUCOSE | IROA  | Non-targeted (ToF) | x |
|                                            | MSMLS |                    |   |
| THYMINE                                    | IROA  | Non-targeted (ToF) | x |
|                                            | MSMLS |                    |   |
| THYROTROPIN RELEASING<br>HORMONE           | IROA  | Non-targeted (ToF) | x |
|                                            | MSMLS |                    |   |
| THYROXINE                                  | IROA  | Non-targeted (ToF) | x |
|                                            | MSMLS |                    |   |
| TOCOPHEROL                                 | IROA  | Non-targeted (ToF) | x |
|                                            | MSMLS |                    |   |

|                                           |               |                    |   |
|-------------------------------------------|---------------|--------------------|---|
| TRANS-4-HYDROXYPROLINE                    | IROA          | Non-targeted (ToF) |   |
|                                           | MSMLS         |                    | x |
| TRANS-CYCLOHEXANE-1,2-DIOL                | IROA          | Non-targeted (ToF) |   |
|                                           | MSMLS         |                    | x |
| TRIDECANOIC ACID                          | Sigma-Aldrich | Non-targeted (ToF) | x |
| TRIGONELLINE                              | IROA          | Non-targeted (ToF) |   |
|                                           | MSMLS         |                    | x |
| TRIIODOTHYRONINE                          | IROA          | Non-targeted (ToF) |   |
|                                           | MSMLS         |                    | x |
| TRIMETHYLAMINE                            | IROA          | Non-targeted (ToF) |   |
|                                           | MSMLS         |                    | x |
| TRYPTAMINE                                | IROA          | Non-targeted (ToF) |   |
|                                           | MSMLS         |                    | x |
| TRYPTOPHAN                                | IROA          | Non-targeted (ToF) |   |
|                                           | MSMLS         |                    | x |
| TRYPTOPHAN                                | IROA          | Non-targeted (ToF) |   |
|                                           | MSMLS         |                    | x |
| TYRAMINE                                  | Sigma-Aldrich | Targeted (QqQ)     | x |
| TYRAMINE                                  | IROA          | Non-targeted (ToF) |   |
|                                           | MSMLS         |                    | x |
| TYROSINE                                  | IROA          | Non-targeted (ToF) |   |
|                                           | MSMLS         |                    | x |
| UNDECANOIC ACID                           | Sigma-Aldrich | Non-targeted (ToF) | x |
| URATE                                     | IROA          | Non-targeted (ToF) |   |
|                                           | MSMLS         |                    | x |
| URIDINE 5'-DIPHOSPHATE                    | IROA          | Non-targeted (ToF) |   |
|                                           | MSMLS         |                    | x |
| URIDINE 5'-DIPHOSPHOGALACTOSE             | IROA          | Non-targeted (ToF) |   |
|                                           | MSMLS         |                    | x |
| URIDINE 5'-DIPHOSPHOGLUCOSE               | IROA          | Non-targeted (ToF) |   |
|                                           | MSMLS         |                    | x |
| URIDINE 5'-DIPHOSPHOGLUCURONIC ACID       | IROA          | Non-targeted (ToF) |   |
|                                           | MSMLS         |                    | x |
| URIDINE 5'-DIPHOSPHO-N-ACETYLGLACTOSAMINE | IROA          | Non-targeted (ToF) |   |
|                                           | MSMLS         |                    | x |
| URIDINE 5'-DIPHOSPHO-N-ACETYLGLUCOSAMINE  | IROA          | Non-targeted (ToF) |   |
|                                           | MSMLS         |                    | x |

|                                 |       |                    |   |
|---------------------------------|-------|--------------------|---|
| URIDINE 5'-TRIPHOSPHATE         | IROA  | Non-targeted (ToF) |   |
|                                 | MSMLS |                    | x |
| URIDINE 5'-TRIPHOSPHATE         | IROA  | Non-targeted (ToF) |   |
|                                 | MSMLS |                    | x |
| VITAMIN B12                     | IROA  | Non-targeted (ToF) |   |
|                                 | MSMLS |                    | x |
| VITAMIN D2                      | IROA  | Non-targeted (ToF) |   |
|                                 | MSMLS |                    | x |
| XANTHOSINE                      | IROA  | Non-targeted (ToF) |   |
|                                 | MSMLS |                    | x |
| XANTHOSINE 5'-<br>MONOPHOSPHATE | IROA  | Non-targeted (ToF) |   |
|                                 | MSMLS |                    | x |
| XANTHURENIC ACID                | IROA  | Non-targeted (ToF) |   |
|                                 | MSMLS |                    | x |
| XYLITOL                         | IROA  | Non-targeted (ToF) |   |
|                                 | MSMLS |                    | x |
| XYLOSE                          | IROA  | Non-targeted (ToF) |   |
|                                 | MSMLS |                    | x |

**Table S2** Metabolite identified in the different exposure groups. Fold change and *p*-values corrected by false discovery rate (FDR) are reported. Marked in red the metabolites significantly different for more than three exposure concentrations and in green QC LC-ToF and Targeted QqQ analysis in the *p*-values below 0.05 are marked.

| METABOLITE                     | Fold change<br>ctrl vs 0.1 µg/L | <i>p</i> -value<br>(FDR) | Fold change<br>Ctrl vs 1.0 µg/L | <i>p</i> -value<br>(FDR) | Fold change<br>ctrl vs 10 µg/L | <i>p</i> -value<br>(FDR) | Fold change<br>ctrl vs 100 µg/L | <i>p</i> -value<br>(FDR) |
|--------------------------------|---------------------------------|--------------------------|---------------------------------|--------------------------|--------------------------------|--------------------------|---------------------------------|--------------------------|
| 3-methyl-2-oxovaleric acid     | -1.81                           | 0.028                    | -2.85                           | 0.001                    | -3.31                          | 0.000                    | -2.70                           | 0.000                    |
| 4-guanidino-butanoate          | 1.44                            | 0.320                    | 4.08                            | 0.002                    | 2.92                           | 0.012                    | 4.06                            | 0.002                    |
| 4-methyl-2-oxovaleric acid     | 2.86                            | 0.074                    | 3.09                            | 0.049                    | 4.91                           | 0.022                    | 2.09                            | 0.127                    |
| 5-HIAA                         | 1.19                            | 0.651                    | 1.29                            | 0.755                    | 1.00                           | 0.620                    | 1.33                            | 0.552                    |
| 5-methylthioadenosine          | -1.57                           | 0.044                    | 1.45                            | 0.193                    | 1.18                           | 0.529                    | 2.44                            | 0.008                    |
| Acetylcholine                  | -1.66                           | 0.026                    | -2.24                           | 0.013                    | -1.75                          | 0.043                    | -1.58                           | 0.008                    |
| Adenine                        | 1.11                            | 0.807                    | 1.39                            | 0.259                    | 1.15                           | 0.572                    | 2.07                            | 0.012                    |
| Arachidic acid                 | -2.83                           | 0.382                    | nd                              | nd                       | nd                             | nd                       | -6.04                           | 0.063                    |
| Arachidonic acid               | 1.32                            | 0.491                    | nd                              | nd                       | -1.40                          | 0.216                    | -1.35                           | 0.113                    |
| Betaine                        | 1.42                            | 0.009                    | 1.18                            | 0.136                    | 1.18                           | 0.114                    | 1.45                            | 0.002                    |
| Carnitine                      | 2.10                            | 0.000                    | 1.47                            | 0.002                    | 1.76                           | 0.000                    | 1.61                            | 0.003                    |
| Choline                        | -1.19                           | 0.026                    | 2.24                            | 0.005                    | 2.01                           | 0.022                    | 1.36                            | 0.008                    |
| cis-10-heptadecenoic acid      | -30.73                          | 0.019                    | -25.19                          | 0.007                    | -1.78                          | 0.559                    | -14.95                          | 0.099                    |
| cis-11,14-eicosadienoic acid   | -1.43                           | 0.138                    | nd                              | nd                       | -1.00                          | 0.000                    | -1.34                           | 0.262                    |
| cis-11,17-eicosatrienoic acid  | -1.27                           | 0.195                    | nd                              | nd                       | nd                             | nd                       | -1.02                           | 0.988                    |
| cis-11-eicosenoic acid         | -12.12                          | 0.000                    | nd                              | nd                       | -1.00                          | 0.000                    | -5.26                           | 0.079                    |
| cis-13,16-docosadienoic acid   | 1.00                            | 0.998                    | nd                              | nd                       | nd                             | nd                       | -1.07                           | 0.926                    |
| cis-15-tetracosenoic acid      | -1.03                           | 0.983                    | nd                              | nd                       | nd                             | nd                       | 1.32                            | 0.429                    |
| cis-5,17-eicosapentaenoic acid | 1.16                            | 0.664                    | nd                              | nd                       | -1.00                          | 0.000                    | -1.01                           | 0.988                    |
| cis-8,14-eicosatrienoic acid   | -2.76                           | 0.071                    | nd                              | nd                       | nd                             | nd                       | -2.51                           | 0.260                    |
| Creatinine                     | 1.17                            | 0.418                    | 1.70                            | 0.014                    | 1.74                           | 0.013                    | 1.80                            | 0.003                    |

|                                 |        |       |        |       |        |       |        |       |
|---------------------------------|--------|-------|--------|-------|--------|-------|--------|-------|
| Diethanolamine                  | -1.89  | 0.053 | -1.24  | 0.261 | 1.07   | 0.775 | 1.17   | 0.643 |
| Dimethylbenzimidazole           | nd     | nd    | 5.25   | 0.002 | nd     | nd    | nd     | nd    |
| Docosahexanoic acid             | -2.39  | 0.005 | nd     | nd    | nd     | nd    | 1.06   | 0.843 |
| Elaidic acid                    | -9.73  | 0.000 | -8.68  | 0.000 | -6.75  | 0.006 | -7.61  | 0.001 |
| Erucic acid                     | -1.01  | 0.998 | nd     | nd    | nd     | nd    | -1.00  | 0.988 |
| GABA                            | 1.26   | 0.262 | 3.28   | 0.245 | 4.44   | 0.624 | 5.38   | 0.036 |
| Glutamate                       | -2.72  | 0.041 | 1.35   | 0.442 | -1.71  | 0.389 | 1.95   | 0.131 |
| Glutamine                       | -2.06  | 0.078 | 8.36   | 0.023 | 2.04   | 0.143 | -2.47  | 0.079 |
| Guanine                         | 1.10   | 0.807 | 1.60   | 0.293 | 1.16   | 0.756 | -1.05  | 0.893 |
| Guanosine                       | -2.92  | 0.002 | -2.46  | 0.001 | -1.94  | 0.020 | -1.46  | 0.003 |
| Henicosanoic acid               | -1.26  | 0.195 | nd     | nd    | nd     | nd    | -1.13  | 0.592 |
| Heptadecanoic acid              | -26.11 | 0.004 | -29.01 | 0.000 | -35.44 | 0.011 | -28.48 | 0.000 |
| Hexadecanol                     | -1.13  | 0.962 | 1.13   | 0.801 | 1.13   | 0.801 | 1.75   | 0.503 |
| Histamine                       | -1.05  | 0.651 | 1.03   | 0.755 | -1.09  | 0.620 | -1.07  | 0.552 |
| Histidine                       | 4.34   | 0.761 | 1.37   | 0.685 | -1.07  | 0.000 | -1.19  | 0.001 |
| Hypoxanthine                    | -1.90  | 0.011 | -1.05  | 0.805 | -1.73  | 0.097 | -1.10  | 0.702 |
| Indole-3-acetaldehyde           | -1.14  | 0.807 | nd     | nd    | 1.39   | 0.475 | nd     | nd    |
| Inosine                         | -2.33  | 0.004 | -1.95  | 0.011 | -1.93  | 0.011 | -1.46  | 0.017 |
| Leucine                         | 1.31   | 0.145 | 1.52   | 0.001 | 1.31   | 0.174 | 1.67   | 0.002 |
| Linoleic acid                   | -1.32  | 0.244 | -9.13  | 0.000 | -3.18  | 0.216 | -6.89  | 0.049 |
| Linolelaidic acid               | -1.88  | 0.117 | -10.94 | 0.005 | -3.84  | 0.216 | -12.04 | 0.012 |
| L-proline                       | 1.12   | 0.540 | 1.58   | 0.008 | 1.14   | 0.615 | 1.46   | 0.024 |
| N6-(delta2-isopentenyl)-adenine | 1.09   | 0.807 | 1.05   | 0.911 | 2.39   | 0.048 | 1.05   | 0.893 |
| N6,N6,N6-trimethyl-L-lysine     | 1.75   | 0.222 | 2.16   | 0.067 | 1.89   | 0.123 | 1.91   | 0.090 |
| N-acetyl-L-leucine              | 1.20   | 0.778 | 2.36   | 0.080 | 2.19   | 0.117 | 2.36   | 0.090 |
| N-acetylputrescine              | 1.35   | 0.156 | 1.24   | 0.109 | 1.31   | 0.141 | 1.11   | 0.680 |
| N-acetylserotonin               | 1.44   | 0.666 | 1.20   | 0.764 | 1.06   | 0.883 | 1.20   | 0.716 |
| Nicotinamide                    | 1.53   | 0.456 | -1.04  | 0.956 | 5.29   | 0.048 | nd     | nd    |

|                                           |        |       |        |       |        |       |        |       |
|-------------------------------------------|--------|-------|--------|-------|--------|-------|--------|-------|
| O-acetyl-L-carnitine                      | 1.27   | 0.540 | 1.06   | 0.911 | 2.37   | 0.040 | 1.20   | 0.680 |
| <b>Oleic acid</b>                         | -14.94 | 0.000 | -14.40 | 0.000 | -4.06  | 0.005 | -14.12 | 0.000 |
| Palmitoleic acid                          | nd     | nd    | nd     | nd    | -1.47  | 0.028 | nd     | nd    |
| <b>Phenylalanine</b>                      | 4.17   | 0.005 | 4.27   | 0.002 | 2.01   | 0.005 | 1.93   | 0.018 |
| Picolinic acid                            | 1.20   | 0.456 | 1.21   | 0.342 | 1.16   | 0.484 | 1.40   | 0.085 |
| Pipecolinic acid                          | 1.22   | 0.415 | 1.25   | 0.293 | 1.34   | 0.114 | 1.94   | 0.006 |
| Putrescine                                | 1.43   | 0.105 | 1.47   | 0.067 | 1.85   | 0.022 | 1.84   | 0.008 |
| Serotonin                                 | -1.63  | 0.177 | -2.29  | 0.103 | -2.58  | 0.173 | -6.28  | 0.036 |
| Spermidine                                | 1.28   | 0.136 | 1.03   | 0.911 | 1.55   | 0.022 | 1.54   | 0.024 |
| <b>Stearic acid</b>                       | -42.80 | 0.000 | -40.42 | 0.000 | -31.92 | 0.001 | -37.25 | 0.000 |
| Tetracosanoic acid                        | -1.37  | 0.094 | nd     | nd    | nd     | nd    | -1.02  | 0.988 |
| Thiopurine S-methylester                  | 1.08   | 0.807 | 1.03   | 0.931 | 1.04   | 0.846 | 1.04   | 0.893 |
| Tricosanoic acid                          | -1.13  | 0.558 | nd     | nd    | nd     | nd    | -1.00  | 0.000 |
| Tryptophan                                | -1.18  | 0.446 | -1.62  | 0.025 | -1.81  | 0.094 | -1.75  | 0.020 |
| Tryptophanamide                           | 1.36   | 0.412 | nd     | nd    | nd     | nd    | nd     | nd    |
| Tyrosine                                  | 1.08   | 0.761 | -1.13  | 0.521 | -1.44  | 0.303 | 1.17   | 0.521 |
| Uracil                                    | -1.37  | 0.023 | -1.20  | 0.081 | 1.15   | 0.550 | 1.11   | 0.680 |
| <b>Uridine</b>                            | -1.78  | 0.002 | -1.98  | 0.000 | -1.42  | 0.011 | -1.25  | 0.138 |
| Uridine-5-monoposphate                    | -1.19  | 0.778 | -2.25  | 0.062 | -2.00  | 0.070 | -1.51  | 0.552 |
| Urocanate                                 | -3.17  | 0.157 | 1.13   | 0.470 | -2.63  | 0.080 | 1.10   | 0.684 |
| <b>Valine</b>                             | 1.39   | 0.016 | 1.60   | 0.049 | 1.18   | 0.146 | 1.52   | 0.002 |
| Xanthine                                  | -1.26  | 0.462 | -1.10  | 0.291 | 1.08   | 0.608 | 1.15   | 0.371 |
| $\alpha$ -linolenic acid                  | -1.97  | 0.162 | nd     | nd    | -2.50  | 0.039 | -1.84  | 0.072 |
| <b><math>\gamma</math>-linolenic acid</b> | -8.51  | 0.015 | -13.73 | 0.005 | -9.72  | 0.033 | -14.38 | 0.000 |

**Table S3** Area under the ROC curve (AUC  $\pm$  Std. error) for metabolites  $> 0.8$  in more than three exposure concentrations.

| Metabolite                 | Imidacloprid exposure concentration ( $\mu\text{g/L}$ ) |                 |                 |                 |
|----------------------------|---------------------------------------------------------|-----------------|-----------------|-----------------|
|                            | 0.1                                                     | 1.0             | 10              | 100             |
| Carnitine                  | $0.89 \pm 0.07$                                         | $0.86 \pm 0.09$ | $0.84 \pm 0.11$ | $0.90 \pm 0.07$ |
| Elaidic acid               | $0.93 \pm 0.07$                                         | $1 \pm 0.01$    | $1 \pm 0.01$    | $0.86 \pm 0.10$ |
| $\gamma$ -linolenic acid   | $0.86 \pm 0.10$                                         | $1 \pm 0.01$    | $1 \pm 0.01$    | $0.83 \pm 0.11$ |
| Linolelaidic acid          | $0.8 \pm 0.15$                                          | $0.94 \pm 0.07$ | $0.88 \pm 0.12$ | $0.9 \pm 0.10$  |
| Stearic acid               | $0.93 \pm 0.07$                                         | $0.88 \pm 0.12$ | $0.88 \pm 0.12$ | $0.86 \pm 0.12$ |
| 3-methyl-2-oxovaleric acid | $0.7 \pm 0.12$                                          | $0.97 \pm 0.03$ | $0.9 \pm 0.08$  | $1 \pm 0.01$    |
| Acetylcholine              | $0.86 \pm 0.11$                                         | $0.96 \pm 0.05$ | $1 \pm 0.00$    | $0.7 \pm 0.19$  |
| Creatinine                 | $0.65 \pm 0.12$                                         | $0.88 \pm 0.07$ | $0.91 \pm 0.06$ | $0.95 \pm 0.05$ |
| Guanosine                  | $0.85 \pm 0.10$                                         | $0.95 \pm 0.04$ | $0.83 \pm 0.09$ | $0.79 \pm 0.11$ |
| Inosine                    | $0.81 \pm 0.10$                                         | $0.85 \pm 0.08$ | $0.84 \pm 0.09$ | $0.77 \pm 0.11$ |
| Phenylalanine              | $0.59 \pm 0.14$                                         | $0.88 \pm 0.07$ | $0.84 \pm 0.09$ | $0.96 \pm 0.04$ |
| Tryptophan                 | $0.7 \pm 0.16$                                          | $0.93 \pm 0.07$ | $0.8 \pm 0.19$  | $1 \pm 0.01$    |



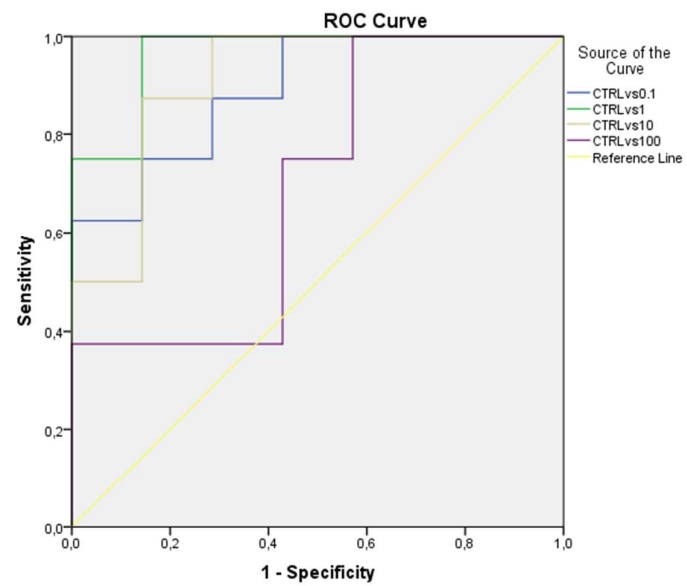

**Figure S8** ROC curves for acetylcholine in the CNS of *L. stagnalis* exposed to increasing concentration of imidacloprid.

## References

- (1) Moza, P. N.; Hustert, K.; Feicht, E.; Kettrup, A. Photolysis of imidacloprid in aqueous solution. *Chemosphere* **1998**, *36* (3), 497–502.
- (2) Nyman, A.-M.; Schirmer, K.; Ashauer, R. Importance of toxicokinetics for interspecies variation in sensitivity to chemicals. *Environ. Sci. Technol.* **2014**, *48* (10), 5946–5954.
- (3) Cantoen, J.; Sloof, W. The usefulness of *Lymnaea stagnalis* L. as a biological indicator in toxicological bio-assays (model substance  $\alpha$ -HCH). *Water Res.* **1977**, *11* (1), 117–121.
- (4) Sawasdee, B.; Köhler, H.-R. Embryo toxicity of pesticides and heavy metals to the ramshorn snail, *Marisa cornuarietis* (Prosobranchia). *Chemosphere* **2009**, *75* (11), 1539–1547.
